# Supplementary material for: General data management workflow to process tabular data in automated and high-throughput heterogeneous catalysis research
Source: Royal Society of Chemistry journal article supplement (doi:10.1039/d4dd00350k), 2025-01-01
Supplement: d4dd00350k1.zip [file d4dd00350k1.zip]

## Sheet: Run Data
SampleTimeId	LocalTime	UtcTime	Secondary	RunName	Reactor	SectionId	Block	Reactor_Gas_Flow_Nml_min	Reactor_Outlet_Pressure	Reactor_Inlet_Pressure	Reactor_Temperature_PV	Reactor_Temperature_SP	ConditionStep	SampleStep	ElapsedRunTime	FIC_110_PV	FIC_120_PV	FIC_130_PV	FIC_140_PV	FIC_150_PV	FIC_160_PV	FIC_170_PV	FIC_300_PV	FIC_110_SP	FIC_120_SP	FIC_130_SP	FIC_140_SP	FIC_150_SP	FIC_160_SP	FIC_170_SP	FIC_300_SP	FI_238_PV	PIC_400_PV	PIC_417_PV	PIC_400_SP	PIC_417_SP	PIC_400_RR	PIC_417_RR	FI_238_temperature_PV	FI_238_density_PV	TIC_981_PV	TIC_983_PV	TIC_993_PV	TIC_975_PV	TI_965_PV	TIC_981_SP	TIC_983_SP	TIC_993_SP	TIC_975_SP
3050	2023-01-23 13:46:39	2023-01-23 12:46:39	FALSE	230116_CO2toMeOH_A001_run3	1		1	12.5294	49.99	50.01	225.02	225	11	2	2.97792	96	24	0.47	80	0	0	0	160.21	96	24	0	80	0	0	0	159.98	0	65	35	65	35	0	0	35.14	785.28	150.26	243.56	180.02	180	27.47	150	250	180	180
3058	2023-01-23 15:24:39	2023-01-23 14:24:39	FALSE	230116_CO2toMeOH_A001_run3	1		1	12.66	49.97	50.03	225	225	11	26	4.61118	96.01	23.99	2.56	80	0	0	0	162.56	96	24	0	80	0	0	0	159.98	0	64.99	34.99	65	35	0	0	35.2	785.31	149.94	241.03	180.11	180.1	27.65	150	250	180	180
3066	2023-01-23 17:03:43	2023-01-23 16:03:43	FALSE	230116_CO2toMeOH_A001_run3	1		1	12.4988	50.02	50	225.01	225	12	2	6.26243	96	24	0	79.98	0	0	0	159.94	96	24	0	80	0	0	0	159.98	0	65	35	65	35	0	0	35.27	785.1	149.73	236.69	180	179.93	27.6	150	250	180	180
3074	2023-01-23 18:41:43	2023-01-23 17:41:43	FALSE	230116_CO2toMeOH_A001_run3	1		1	12.5	49.99	49.98	225	225	12	26	7.89566	96.02	23.99	0	79.99	0	0	0	159.94	96	24	0	80	0	0	0	159.98	0	65	35	65	35	0	0	35.23	785.32	150.05	242.26	179.93	180.03	27.6	150	250	180	180
3082	2023-01-23 20:35:42	2023-01-23 19:35:42	FALSE	230116_CO2toMeOH_A001_run3	1		1	12.5	50.01	50.02	251.38	250	13	2	9.79533	96	24	0	80	0	0	0	159.78	96	24	0	80	0	0	0	159.98	0	65	35	65	35	0	0	35.27	785.27	149.99	238.24	180.1	180.08	28.13	150	250	180	180
3090	2023-01-23 22:13:41	2023-01-23 21:13:41	FALSE	230116_CO2toMeOH_A001_run3	1		1	12.5006	50.02	50.01	250.03	250	13	26	11.4285	96	24	0	80.01	0	0	0	159.94	96	24	0	80	0	0	0	159.98	0	64.99	35	65	35	0	0	35.35	784.95	150.01	239.06	180.09	180.1	28.66	150	250	180	180
3098	2023-01-23 23:52:45	2023-01-23 22:52:45	FALSE	230116_CO2toMeOH_A001_run3	1		1	12.5212	49.97	50.01	250	250	14	2	13.0795	96	23.99	0.35	80	0	0	0	160.09	96	24	0	80	0	0	0	159.98	0	65.01	35	65	35	0	0	35.33	785.09	150.11	238.83	179.91	179.93	28.82	150	250	180	180
3105	2023-01-24 01:30:45	2023-01-24 00:30:45	FALSE	230116_CO2toMeOH_A001_run3	1		1	12.5238	50.05	50.01	250.01	250	14	26	14.7128	96.01	24	0.36	80.01	0	0	0	160.25	96	24	0	80	0	0	0	159.98	0	65	35	65	35	0	0	35.28	785.23	150.11	241.94	180.01	180.01	28.71	150	250	180	180
3113	2023-01-24 03:24:56	2023-01-24 02:24:56	FALSE	230116_CO2toMeOH_A001_run3	1		1	12.4994	49.96	50.01	276.31	275	15	2	16.6159	95.99	24.01	0	79.99	0	0	0	159.82	96	24	0	80	0	0	0	159.98	0	65	35	65	35	0	0	35.2	785.29	150.07	238.24	179.99	180.03	29.47	150	250	180	180
3121	2023-01-24 05:02:55	2023-01-24 04:02:55	FALSE	230116_CO2toMeOH_A001_run3	1		1	12.5	49.96	50	275	275	15	26	18.2492	96	24	0	80	0	0	0	160.02	96	24	0	80	0	0	0	159.98	0	64.99	35	65	35	0	0	35.31	785.12	150.11	239.25	180.03	179.96	29.75	150	250	180	180
3129	2023-01-24 06:41:59	2023-01-24 05:41:59	FALSE	230116_CO2toMeOH_A001_run3	1		1	12.5	49.99	50.02	275.01	275	16	2	19.9002	95.99	24	0	80.01	0	0	0	160.13	96	24	0	80	0	0	0	159.98	0	65	35	65	35	0	0	35.37	785.2	149.92	239.62	180.03	180.03	29.69	150	250	180	180
3137	2023-01-24 08:19:59	2023-01-24 07:19:59	FALSE	230116_CO2toMeOH_A001_run3	1		1	12.4981	49.94	49.99	275	275	16	26	21.5334	95.99	23.99	0	79.99	0	0	0	160.02	96	24	0	80	0	0	0	159.98	0	64.99	35	65	35	0	0	35.3	785.16	150.16	237.87	179.96	180.01	29.77	150	250	180	180
3145	2023-01-24 10:14:28	2023-01-24 09:14:28	FALSE	230116_CO2toMeOH_A001_run3	1		1	12.4956	49.94	50.01	301.26	300	17	2	23.4415	96	24	0	79.93	0	0	0	160.25	96	24	0	80	0	0	0	159.98	0	64.99	35	65	35	0	0	35.53	784.85	149.83	238.48	179.99	179.98	30.23	150	250	180	180
3153	2023-01-24 11:52:27	2023-01-24 10:52:27	FALSE	230116_CO2toMeOH_A001_run3	1		1	12.4994	50	50	300	300	17	26	25.0747	95.99	24	0	80	0	0	0	159.9	96	24	0	80	0	0	0	159.98	0	65	35	65	35	0	0	35.72	784.66	149.89	238.06	180.02	179.95	30.54	150	250	180	180
3161	2023-01-24 13:31:31	2023-01-24 12:31:31	FALSE	230116_CO2toMeOH_A001_run3	1		1	12.5087	49.98	50.01	299.99	300	18	2	26.7257	95.99	24	0.11	80.04	0	0	0	160.21	96	24	0	80	0	0	0	159.98	0	65.01	35	65	35	0	0	35.8	784.73	150.04	241.68	179.91	179.94	30.6	150	250	180	180
3169	2023-01-24 15:09:30	2023-01-24 14:09:30	FALSE	230116_CO2toMeOH_A001_run3	1		1	12.4987	49.98	50.01	300.01	300	18	26	28.3589	95.99	23.99	0	80	0	0	0	159.86	96	24	0	80	0	0	0	159.98	0	65	35	65	35	0	0	35.82	784.84	150.1	239.33	179.99	180.04	30.51	150	250	180	180
3051	2023-01-23 13:58:54	2023-01-23 12:58:54	FALSE	230116_CO2toMeOH_A001_run3	2		1	12.5	49.84	50	225.01	225	11	5	3.18204	96	24	0	80	0	0	0	159.44	96	24	0	80	0	0	0	159.98	0	65	35	65	35	0	0	35.17	785.35	150.05	237.09	180.04	180.02	27.43	150	250	180	180
3059	2023-01-23 15:36:54	2023-01-23 14:36:54	FALSE	230116_CO2toMeOH_A001_run3	2		1	12.4994	49.87	49.99	225	225	11	29	4.81534	96.01	24	0	79.98	0	0	0	160.21	96	24	0	80	0	0	0	159.98	0	65	35	65	35	0	0	35.21	785.33	150.16	241.59	180.04	180.01	27.6	150	250	180	180
3067	2023-01-23 17:15:58	2023-01-23 16:15:58	FALSE	230116_CO2toMeOH_A001_run3	2		1	12.5012	49.89	50.02	225	225	12	5	6.46659	96	24	0	80.02	0	0	0	160.13	96	24	0	80	0	0	0	159.98	0	65	35	65	35	0	0	35.26	785.24	149.94	241.4	179.96	179.98	27.6	150	250	180	180
3075	2023-01-23 18:53:58	2023-01-23 17:53:58	FALSE	230116_CO2toMeOH_A001_run3	2		1	12.4994	49.85	50	225	225	12	29	8.09981	96	24.01	0	79.98	0	0	0	159.82	96	24	0	80	0	0	0	159.98	0	65	35	65	35	0	0	35.22	785.33	149.91	238.49	180.03	179.98	27.59	150	250	180	180
3083	2023-01-23 20:47:57	2023-01-23 19:47:57	FALSE	230116_CO2toMeOH_A001_run3	2		1	12.4963	49.89	50	250.73	250	13	5	9.99949	95.99	23.99	0	79.96	0	0	0	159.98	96	24	0	80	0	0	0	159.98	0	65	35	65	35	0	0	35.28	785.15	149.95	240.93	180.04	180.06	28.36	150	250	180	180
3091	2023-01-23 22:25:56	2023-01-23 21:25:56	FALSE	230116_CO2toMeOH_A001_run3	2		1	12.5	49.9	50.01	250.02	250	13	29	11.6327	96	24	0	80	0	0	0	159.75	96	24	0	80	0	0	0	159.98	0	65	35	65	35	0	0	35.34	785.2	150.07	241.05	180.03	180.05	28.57	150	250	180	180
3106	2023-01-24 01:43:00	2023-01-24 00:43:00	FALSE	230116_CO2toMeOH_A001_run3	2		1	12.4981	49.94	49.99	250.01	250	14	29	14.917	95.99	23.99	0	79.99	0	0	0	159.9	96	24	0	80	0	0	0	159.98	0	65	35	65	35	0	0	35.28	785.14	149.99	240.29	179.95	179.98	28.78	150	250	180	180
3114	2023-01-24 03:37:11	2023-01-24 02:37:11	FALSE	230116_CO2toMeOH_A001_run3	2		1	12.5006	49.91	50	275.75	275	15	5	16.8201	95.99	24.01	0	80.01	0	0	0	160.25	96	24	0	80	0	0	0	159.98	0	65	35	65	35	0	0	35.2	785.31	149.98	238.62	179.99	179.97	29.46	150	250	180	180
3122	2023-01-24 05:15:10	2023-01-24 04:15:10	FALSE	230116_CO2toMeOH_A001_run3	2		1	12.5	49.86	49.99	275	275	15	29	18.4533	96	24	0	80	0	0	0	160.09	96	24	0	80	0	0	0	159.98	0	64.99	35	65	35	0	0	35.31	784.98	150.11	238.13	180.07	180.03	29.72	150	250	180	180
3130	2023-01-24 06:54:14	2023-01-24 05:54:14	FALSE	230116_CO2toMeOH_A001_run3	2		1	12.5019	49.87	49.99	275.02	275	16	5	20.1043	96.01	23.99	0	80.03	0	0	0	159.82	96	24	0	80	0	0	0	159.98	0	64.99	35	65	35	0	0	35.34	785.02	150.31	235.86	180	180.02	29.63	150	250	180	180
3138	2023-01-24 08:32:14	2023-01-24 07:32:14	FALSE	230116_CO2toMeOH_A001_run3	2		1	12.4994	49.87	49.99	274.99	275	16	29	21.7375	96	23.99	0	80	0	0	0	160.09	96	24	0	80	0	0	0	159.98	0	65	35	65	35	0	0	35.31	785.01	149.88	237.36	180	179.92	29.8	150	250	180	180
3146	2023-01-24 10:26:43	2023-01-24 09:26:43	FALSE	230116_CO2toMeOH_A001_run3	2		1	12.5006	49.88	49.99	300.75	300	17	5	23.6457	96.01	24	0	80	0	0	0	159.86	96	24	0	80	0	0	0	159.98	0	65	35	65	35	0	0	35.56	785.01	150.11	238.48	179.83	179.87	30.21	150	250	180	180
3154	2023-01-24 12:04:42	2023-01-24 11:04:42	FALSE	230116_CO2toMeOH_A001_run3	2		1	12.4981	49.85	49.99	300.02	300	17	29	25.2789	95.99	24	0	79.98	0	0	0	159.94	96	24	0	80	0	0	0	159.98	0	65	35	65	35	0	0	35.74	784.8	150.08	239.63	180.02	179.99	30.59	150	250	180	180
3162	2023-01-24 13:43:46	2023-01-24 12:43:46	FALSE	230116_CO2toMeOH_A001_run3	2		1	12.4994	49.92	49.99	299.99	300	18	5	26.9299	95.99	24	0	80	0	0	0	160.05	96	24	0	80	0	0	0	159.98	0	65	35	65	35	0	0	35.79	784.84	150.05	237.04	180.03	180.02	30.66	150	250	180	180
3170	2023-01-24 15:21:45	2023-01-24 14:21:45	FALSE	230116_CO2toMeOH_A001_run3	2		1	12.505	49.91	50	300	300	18	29	28.5631	96.02	24.01	0	80.05	0	0	0	159.94	96	24	0	80	0	0	0	159.98	0	64.99	35	65	35	0	0	35.79	784.69	150.09	239.72	180.02	180.03	30.66	150	250	180	180
3052	2023-01-23 14:11:09	2023-01-23 13:11:09	FALSE	230116_CO2toMeOH_A001_run3	3		1	12.5012	50.11	49.99	225.01	225	11	8	3.38618	96.02	24	0	80	0	0	0	161.63	96	24	0	80	0	0	0	159.98	0	65	35	65	35	0	0	35.18	785.35	149.88	237	180.02	179.99	27.49	150	250	180	180
3060	2023-01-23 15:49:09	2023-01-23 14:49:09	FALSE	230116_CO2toMeOH_A001_run3	3		1	12.5006	50.11	50	224.99	225	11	32	5.01947	96.01	24	0	80	0	0	0	159.98	96	24	0	80	0	0	0	159.98	0	65	35	65	35	0	0	35.22	785.3	149.82	238.33	180.06	180	27.68	150	250	180	180
3068	2023-01-23 17:28:13	2023-01-23 16:28:13	FALSE	230116_CO2toMeOH_A001_run3	3		1	12.4988	50.09	49.99	225.02	225	12	8	6.67074	96	24	0	79.98	0	0	0	159.78	96	24	0	80	0	0	0	159.98	0	65.01	35	65	35	0	0	35.27	785.06	150.09	242.01	180	180.02	27.58	150	250	180	180
3076	2023-01-23 19:06:13	2023-01-23 18:06:13	FALSE	230116_CO2toMeOH_A001_run3	3		1	12.4988	50.1	50	225	225	12	32	8.30396	96	24	0	79.98	0	0	0	159.82	96	24	0	80	0	0	0	159.98	0	64.99	34.99	65	35	0	0	35.22	785.31	149.84	238.49	180.02	179.99	27.69	150	250	180	180
3084	2023-01-23 21:00:11	2023-01-23 20:00:11	FALSE	230116_CO2toMeOH_A001_run3	3		1	12.4981	50.11	50	250.27	250	13	8	10.2036	95.99	24	0	79.98	0	0	0	159.9	96	24	0	80	0	0	0	159.98	0	65	35	65	35	0	0	35.31	785.26	149.87	240.88	179.96	179.95	28.37	150	250	180	180
3092	2023-01-23 22:38:11	2023-01-23 21:38:11	FALSE	230116_CO2toMeOH_A001_run3	3		1	12.5	50.13	50.01	250.01	250	13	32	11.8368	96	24	0	80	0	0	0	160.17	96	24	0	80	0	0	0	159.98	0	65	35	65	35	0	0	35.3	785.06	150.11	238.04	179.99	179.97	28.56	150	250	180	180
3099	2023-01-24 00:17:15	2023-01-23 23:17:15	FALSE	230116_CO2toMeOH_A001_run3	3		1	12.5	50.11	50	250	250	14	8	13.4878	96	24	0	80	0	0	0	159.9	96	24	0	80	0	0	0	159.98	0	64.99	35	65	35	0	0	35.34	785.17	150.06	239.33	180.03	180.06	28.75	150	250	180	180
3107	2023-01-24 01:55:14	2023-01-24 00:55:14	FALSE	230116_CO2toMeOH_A001_run3	3		1	12.5	50.11	50	250	250	14	32	15.1211	96	24.01	0	79.99	0	0	0	160.05	96	24	0	80	0	0	0	159.98	0	65.01	35	65	35	0	0	35.25	785.14	150.19	237.83	180.01	180	28.67	150	250	180	180
3115	2023-01-24 03:49:26	2023-01-24 02:49:26	FALSE	230116_CO2toMeOH_A001_run3	3		1	12.4975	50.07	50.01	275.29	275	15	8	17.0242	95.99	24	0	79.97	0	0	0	159.55	96	24	0	80	0	0	0	159.98	0	65	35	65	35	0	0	35.22	785.18	150.09	237.99	180.01	180.03	29.48	150	250	180	180
3123	2023-01-24 05:27:25	2023-01-24 04:27:25	FALSE	230116_CO2toMeOH_A001_run3	3		1	12.5013	50.09	50	275.04	275	15	32	18.6575	96.01	24.01	0	80	0	0	0	159.94	96	24	0	80	0	0	0	159.98	0	65	35	65	35	0	0	35.33	785.19	149.87	239.49	180.02	180.01	29.73	150	250	180	180
3131	2023-01-24 07:06:29	2023-01-24 06:06:29	FALSE	230116_CO2toMeOH_A001_run3	3		1	12.4969	50.11	50	275.01	275	16	8	20.3085	96	23.99	0	79.96	0	0	0	159.9	96	24	0	80	0	0	0	159.98	0	65	35	65	35	0	0	35.34	784.96	149.98	239.31	180	180.03	29.75	150	250	180	180
3139	2023-01-24 08:44:28	2023-01-24 07:44:28	FALSE	230116_CO2toMeOH_A001_run3	3		1	12.4981	50.08	50.01	275	275	16	32	21.9417	96	24.01	0	79.96	0	0	0	159.9	96	24	0	80	0	0	0	159.98	0	65	35	65	35	0	0	35.35	785	149.88	239.95	180.04	179.97	29.73	150	250	180	180
3147	2023-01-24 10:38:58	2023-01-24 09:38:58	FALSE	230116_CO2toMeOH_A001_run3	3		1	12.5	50.08	50	300.32	300	17	8	23.8498	96	24	0	80	0	0	0	159.78	96	24	0	80	0	0	0	159.98	0	65	35	65	35	0	0	35.6	784.99	149.87	235.95	179.96	179.98	30.29	150	250	180	180
3155	2023-01-24 12:16:57	2023-01-24 11:16:57	FALSE	230116_CO2toMeOH_A001_run3	3		1	12.4919	50.1	50	299.99	300	17	32	25.4831	96	24.01	0	79.86	0	0	0	160.13	96	24	0	80	0	0	0	159.98	0	65	35	65	35	0	0	35.75	784.69	150.21	239.62	179.93	180	30.5	150	250	180	180
3163	2023-01-24 13:56:01	2023-01-24 12:56:01	FALSE	230116_CO2toMeOH_A001_run3	3		1	12.5	50.1	49.99	300	300	18	8	27.134	96.01	23.99	0	80	0	0	0	159.82	96	24	0	80	0	0	0	159.98	0	65	35	65	35	0	0	35.79	784.58	150.08	239.22	179.93	179.96	30.74	150	250	180	180
3171	2023-01-24 15:34:00	2023-01-24 14:34:00	FALSE	230116_CO2toMeOH_A001_run3	3		1	12.4994	50.1	50.01	300	300	18	32	28.7672	95.99	24	0	80	0	0	0	159.94	96	24	0	80	0	0	0	159.98	0	64.99	35	65	35	0	0	35.77	784.59	149.87	238	179.98	179.99	30.56	150	250	180	180
3053	2023-01-23 14:23:24	2023-01-23 13:23:24	FALSE	230116_CO2toMeOH_A001_run3	4		1	12.5019	49.88	50	225.01	225	11	11	3.59036	96.02	23.99	0	80.02	0	0	0	160.59	96	24	0	80	0	0	0	159.98	0	65	35	65	35	0	0	35.16	785.15	149.92	240.5	180	180.02	27.47	150	250	180	180
3061	2023-01-23 16:01:23	2023-01-23 15:01:23	FALSE	230116_CO2toMeOH_A001_run3	4		1	12.5006	49.85	50	225	225	11	35	5.22362	96.01	24	0	80	0	0	0	159.94	96	24	0	80	0	0	0	159.98	0	65	35	65	35	0	0	35.24	785.28	149.8	238.53	179.99	180.02	27.54	150	250	180	180
3069	2023-01-23 17:40:28	2023-01-23 16:40:28	FALSE	230116_CO2toMeOH_A001_run3	4		1	12.5	49.91	49.98	225	225	12	11	6.87488	96	24	0	80	0	0	0	159.98	96	24	0	80	0	0	0	159.98	0	65	35	65	35	0	0	35.27	785.05	150.03	238.14	180.09	179.97	27.57	150	250	180	180
3077	2023-01-23 19:18:28	2023-01-23 18:18:28	FALSE	230116_CO2toMeOH_A001_run3	4		1	12.5006	49.84	49.99	224.99	225	12	35	8.50811	96.01	24	0	80	0	0	0	160.05	96	24	0	80	0	0	0	159.98	0	65	35	65	35	0	0	35.22	785.11	150.04	239.66	179.91	179.98	27.53	150	250	180	180
3085	2023-01-23 21:12:26	2023-01-23 20:12:26	FALSE	230116_CO2toMeOH_A001_run3	4		1	12.4975	49.86	49.99	250.1	250	13	11	10.4078	95.98	24	0	79.98	0	0	0	160.05	96	24	0	80	0	0	0	159.98	0	65	35	65	35	0	0	35.31	784.98	150.14	240.35	179.95	179.96	28.51	150	250	180	180
3093	2023-01-23 22:50:26	2023-01-23 21:50:26	FALSE	230116_CO2toMeOH_A001_run3	4		1	12.4994	49.88	50	249.99	250	13	35	12.041	96.01	24	0	79.98	0	0	0	160.05	96	24	0	80	0	0	0	159.98	0	65	35	65	35	0	0	35.33	785.15	150.11	239.57	180.07	180.03	28.64	150	250	180	180
3100	2023-01-24 00:29:30	2023-01-23 23:29:30	FALSE	230116_CO2toMeOH_A001_run3	4		1	12.5	49.85	49.99	250.01	250	14	11	13.692	96	24	0	80	0	0	0	159.9	96	24	0	80	0	0	0	159.98	0	65	35	65	35	0	0	35.34	785	149.93	241.12	180.02	180.05	28.67	150	250	180	180
3108	2023-01-24 02:07:29	2023-01-24 01:07:29	FALSE	230116_CO2toMeOH_A001_run3	4		1	12.4994	49.84	50	250.01	250	14	35	15.3253	95.99	24	0	80	0	0	0	159.78	96	24	0	80	0	0	0	159.98	0	65	35	65	35	0	0	35.24	785.17	149.92	238.89	179.96	179.95	28.75	150	250	180	180
3116	2023-01-24 04:01:41	2023-01-24 03:01:41	FALSE	230116_CO2toMeOH_A001_run3	4		1	12.5	49.87	49.98	275.13	275	15	11	17.2284	96.01	24	0	79.99	0	0	0	159.9	96	24	0	80	0	0	0	159.98	0	65	35	65	35	0	0	35.25	785.03	150.02	239.5	180.02	179.97	29.59	150	250	180	180
3124	2023-01-24 05:39:40	2023-01-24 04:39:40	FALSE	230116_CO2toMeOH_A001_run3	4		1	12.5006	49.9	50	275	275	15	35	18.8616	96.01	23.99	0	80.01	0	0	0	159.9	96	24	0	80	0	0	0	159.98	0	65.01	35	65	35	0	0	35.32	785.23	149.94	239.47	179.97	179.96	29.79	150	250	180	180
3132	2023-01-24 07:18:44	2023-01-24 06:18:44	FALSE	230116_CO2toMeOH_A001_run3	4		1	12.5	49.85	49.98	275	275	16	11	20.5126	95.99	24.01	0	80	0	0	0	159.9	96	24	0	80	0	0	0	159.98	0	65	35	65	35	0	0	35.31	785.22	149.84	241.32	180	179.96	29.65	150	250	180	180
3140	2023-01-24 08:56:43	2023-01-24 07:56:43	FALSE	230116_CO2toMeOH_A001_run3	4		1	12.4987	49.89	50.01	275	275	16	35	22.1458	95.99	23.99	0	80	0	0	0	160.17	96	24	0	80	0	0	0	159.98	0	64.99	35	65	35	0	0	35.37	785.19	150.06	240.66	179.99	179.98	29.56	150	250	180	180
3148	2023-01-24 10:51:13	2023-01-24 09:51:13	FALSE	230116_CO2toMeOH_A001_run3	4		1	12.5006	49.84	50	300.14	300	17	11	24.054	96.01	24	0	80	0	0	0	159.86	96	24	0	80	0	0	0	159.98	0	64.99	35	65	35	0	0	35.66	784.71	149.97	241.36	179.98	179.9	30.38	150	250	180	180
3156	2023-01-24 12:29:12	2023-01-24 11:29:12	FALSE	230116_CO2toMeOH_A001_run3	4		1	12.5	49.85	49.99	300.02	300	17	35	25.6872	95.99	24	0	80.01	0	0	0	159.9	96	24	0	80	0	0	0	159.98	0	65	35	65	35	0	0	35.76	784.76	149.91	241.86	180	180.03	30.54	150	250	180	180
3164	2023-01-24 14:08:16	2023-01-24 13:08:16	FALSE	230116_CO2toMeOH_A001_run3	4		1	12.4994	49.88	49.99	300	300	18	11	27.3382	96	23.99	0	80	0	0	0	159.9	96	24	0	80	0	0	0	159.98	0	64.99	35	65	35	0	0	35.8	784.59	149.89	237.7	179.94	179.97	30.74	150	250	180	180
3172	2023-01-24 15:46:15	2023-01-24 14:46:15	FALSE	230116_CO2toMeOH_A001_run3	4		1	12.4969	49.86	50	299.99	300	18	35	28.9714	96	23.99	0	79.96	0	0	0	160.13	96	24	0	80	0	0	0	159.98	0	64.99	35	65	35	0	0	35.77	784.79	150.14	236.77	180.02	179.99	30.69	150	250	180	180
3054	2023-01-23 14:35:39	2023-01-23 13:35:39	FALSE	230116_CO2toMeOH_A001_run3	5		2	12.4988	49.93	49.99	225.02	225	11	14	3.79451	95.98	24	0	80	0	0	0	160.05	96	24	0	80	0	0	0	159.98	0	65	35	65	35	0	0	35.13	785.39	149.85	240.35	180.01	180	27.56	150	250	180	180
3062	2023-01-23 16:13:38	2023-01-23 15:13:38	FALSE	230116_CO2toMeOH_A001_run3	5		2	12.5	49.96	49.98	224.99	225	11	38	5.42777	96	24	0	80	0	0	0	160.21	96	24	0	80	0	0	0	159.98	0	65	34.99	65	35	0	0	35.24	785.25	149.98	239.1	179.97	179.9	27.41	150	250	180	180
3070	2023-01-23 17:52:43	2023-01-23 16:52:43	FALSE	230116_CO2toMeOH_A001_run3	5		2	12.5006	49.95	49.99	224.99	225	12	14	7.07904	96	24	0	80.01	0	0	0	160.29	96	24	0	80	0	0	0	159.98	0	65	35	65	35	0	0	35.27	785.08	149.93	240.03	179.99	179.98	27.7	150	250	180	180
3078	2023-01-23 19:30:43	2023-01-23 18:30:43	FALSE	230116_CO2toMeOH_A001_run3	5		2	12.4987	49.99	50.01	224.98	225	12	38	8.71227	95.99	23.99	0	80	0	0	0	159.9	96	24	0	80	0	0	0	159.98	0	65	35	65	35	0	0	35.25	785.05	149.93	238.57	179.92	179.91	27.65	150	250	180	180
3086	2023-01-23 21:24:41	2023-01-23 20:24:41	FALSE	230116_CO2toMeOH_A001_run3	5		2	12.5006	49.94	50	250.06	250	13	14	10.6119	96	24	0	80.01	0	0	0	160.02	96	24	0	80	0	0	0	159.98	0	65.01	35	65	35	0	0	35.29	785.17	150.16	239.93	180.04	180.03	28.49	150	250	180	180
3094	2023-01-23 23:02:41	2023-01-23 22:02:41	FALSE	230116_CO2toMeOH_A001_run3	5		2	12.5	49.96	49.99	250	250	13	38	12.2451	96	24	0	80	0	0	0	160.29	96	24	0	80	0	0	0	159.98	0	65.01	35	65	35	0	0	35.33	784.97	149.99	238.22	179.95	179.94	28.69	150	250	180	180
3101	2023-01-24 00:41:45	2023-01-23 23:41:45	FALSE	230116_CO2toMeOH_A001_run3	5		2	12.5006	49.95	50.01	250.01	250	14	14	13.8962	96	24	0	80.01	0	0	0	159.98	96	24	0	80	0	0	0	159.98	0	65	35	65	35	0	0	35.33	785.19	149.88	237.43	180.02	179.97	28.69	150	250	180	180
3109	2023-01-24 02:19:44	2023-01-24 01:19:44	FALSE	230116_CO2toMeOH_A001_run3	5		2	12.5012	50	50.03	250.01	250	14	38	15.5294	96	24	0	80.02	0	0	0	159.78	96	24	0	80	0	0	0	159.98	0	65	35	65	35	0	0	35.22	785.04	150.04	242.39	180.03	180	28.76	150	250	180	180
3117	2023-01-24 04:13:56	2023-01-24 03:13:56	FALSE	230116_CO2toMeOH_A001_run3	5		2	12.5013	49.96	49.99	275.05	275	15	14	17.4325	96.01	24	0	80.01	0	0	0	159.82	96	24	0	80	0	0	0	159.98	0	65	35	65	35	0	0	35.27	785.26	149.86	238.94	179.96	179.98	29.68	150	250	180	180
3125	2023-01-24 05:51:55	2023-01-24 04:51:55	FALSE	230116_CO2toMeOH_A001_run3	5		2	12.4994	50	49.99	274.99	275	15	38	19.0658	96	24	0	79.99	0	0	0	159.94	96	24	0	80	0	0	0	159.98	0	64.99	35	65	35	0	0	35.36	785.03	149.92	239.48	179.94	179.99	29.7	150	250	180	180
3133	2023-01-24 07:30:59	2023-01-24 06:30:59	FALSE	230116_CO2toMeOH_A001_run3	5		2	12.5	49.99	50.01	275	275	16	14	20.7168	96	24	0	80	0	0	0	160.17	96	24	0	80	0	0	0	159.98	0	65	35	65	35	0	0	35.29	785.16	149.79	237.57	180.01	180.01	29.89	150	250	180	180
3141	2023-01-24 09:08:58	2023-01-24 08:08:58	FALSE	230116_CO2toMeOH_A001_run3	5		2	12.5006	49.96	50	275	275	16	38	22.35	96.01	24	0	80	0	0	0	160.02	96	24	0	80	0	0	0	159.98	0	65	35	65	35	0	0	35.42	784.92	150.08	239.65	180.01	179.97	29.64	150	250	180	180
3149	2023-01-24 11:03:28	2023-01-24 10:03:28	FALSE	230116_CO2toMeOH_A001_run3	5		2	12.4969	50.01	50.01	300.09	300	17	14	24.2582	96	23.99	0	79.96	0	0	0	160.13	96	24	0	80	0	0	0	159.98	0	65	35	65	35	0	0	35.67	784.86	149.82	237.04	180.07	179.97	30.35	150	250	180	180
3157	2023-01-24 12:41:27	2023-01-24 11:41:27	FALSE	230116_CO2toMeOH_A001_run3	5		2	12.5025	49.95	50	300	300	17	38	25.8914	96.02	24	0	80.02	0	0	0	159.94	96	24	0	80	0	0	0	159.98	0	64.99	35	65	35	0	0	35.76	784.69	150.04	237.65	179.9	179.96	30.55	150	250	180	180
3165	2023-01-24 14:20:31	2023-01-24 13:20:31	FALSE	230116_CO2toMeOH_A001_run3	5		2	12.4981	50.01	49.99	300	300	18	14	27.5423	96	24	0	79.97	0	0	0	159.86	96	24	0	80	0	0	0	159.98	0	65	35	65	35	0	0	35.81	784.61	149.94	237.65	180	180.01	30.73	150	250	180	180
3173	2023-01-24 15:58:30	2023-01-24 14:58:30	FALSE	230116_CO2toMeOH_A001_run3	5		2	12.5	50.01	50	299.97	300	18	38	29.1756	96.01	24	0	79.99	0	0	0	159.86	96	24	0	80	0	0	0	159.98	0	65	35	65	35	0	0	35.74	784.86	150.13	243.5	179.99	180	30.54	150	250	180	180
3055	2023-01-23 14:47:54	2023-01-23 13:47:54	FALSE	230116_CO2toMeOH_A001_run3	6		2	12.5006	50.13	50.07	224.98	225	11	17	3.99867	96.01	24	0	80	0	0	0	120.4	96	24	0	80	0	0	0	159.98	0	65.01	35	65	35	0	0	35.15	785.23	150.02	239.44	179.92	179.95	27.56	150	250	180	180
3063	2023-01-23 16:25:53	2023-01-23 15:25:53	FALSE	230116_CO2toMeOH_A001_run3	6		2	12.5	50.1	50	225	225	11	41	5.63192	96	24	0	80	0	0	0	160.44	96	24	0	80	0	0	0	159.98	0	64.99	35	65	35	0	0	35.25	785.3	150.01	239.29	180.1	180.07	27.57	150	250	180	180
3071	2023-01-23 18:04:58	2023-01-23 17:04:58	FALSE	230116_CO2toMeOH_A001_run3	6		2	12.4994	50.12	50	224.99	225	12	17	7.2832	95.98	24	0	80.01	0	0	0	159.82	96	24	0	80	0	0	0	159.98	0	64.99	35	65	35	0	0	35.27	785.25	149.7	239.74	180	179.97	27.7	150	250	180	180
3079	2023-01-23 19:42:57	2023-01-23 18:42:57	FALSE	230116_CO2toMeOH_A001_run3	6		2	12.5006	50.09	49.99	225.01	225	12	41	8.91642	96.01	24	0	80	0	0	0	159.94	96	24	0	80	0	0	0	159.98	0	65	35	65	35	0	0	35.25	785.07	149.94	240.21	180.01	180.08	27.59	150	250	180	180
3087	2023-01-23 21:36:56	2023-01-23 20:36:56	FALSE	230116_CO2toMeOH_A001_run3	6		2	12.4975	50.13	49.99	250.03	250	13	17	10.8161	95.99	23.99	0	79.98	0	0	0	159.86	96	24	0	80	0	0	0	159.98	0	65	35	65	35	0	0	35.29	785.03	150.02	238.91	180.02	179.94	28.58	150	250	180	180
3095	2023-01-23 23:14:56	2023-01-23 22:14:56	FALSE	230116_CO2toMeOH_A001_run3	6		2	12.5	50.15	49.99	250.01	250	13	41	12.4493	96	24.01	0	79.99	0	0	0	160.02	96	24	0	80	0	0	0	159.98	0	64.99	35	65	35	0	0	35.33	785.12	150.05	238.8	179.91	179.95	28.77	150	250	180	180
3102	2023-01-24 00:54:00	2023-01-23 23:54:00	FALSE	230116_CO2toMeOH_A001_run3	6		2	12.5025	50.09	50	249.99	250	14	17	14.1004	96	23.99	0	80.05	0	0	0	159.82	96	24	0	80	0	0	0	159.98	0	65	35	65	35	0	0	35.31	785.04	149.97	241.81	179.98	179.99	28.89	150	250	180	180
3110	2023-01-24 02:31:59	2023-01-24 01:31:59	FALSE	230116_CO2toMeOH_A001_run3	6		2	12.4994	50.08	50	250	250	14	41	15.7336	96.02	23.99	0	79.98	0	0	0	160.09	96	24	0	80	0	0	0	159.98	0	65	35	65	35	0	0	35.21	785.29	150.25	241.69	179.95	180.02	28.97	150	250	180	180
3118	2023-01-24 04:26:11	2023-01-24 03:26:11	FALSE	230116_CO2toMeOH_A001_run3	6		2	12.5006	50.05	50	275.06	275	15	17	17.6367	96	24	0	80.01	0	0	0	159.63	96	24	0	80	0	0	0	159.98	0	65.01	35	65	35	0	0	35.28	785	149.92	240.88	179.96	180.07	29.59	150	250	180	180
3126	2023-01-24 06:04:10	2023-01-24 05:04:10	FALSE	230116_CO2toMeOH_A001_run3	6		2	12.5	50.13	50	275.01	275	15	41	19.2699	96.01	24	0	79.99	0	0	0	159.98	96	24	0	80	0	0	0	159.98	0	64.99	35	65	35	0	0	35.36	784.98	150.02	238.49	179.96	180.02	29.71	150	250	180	180
3134	2023-01-24 07:43:14	2023-01-24 06:43:14	FALSE	230116_CO2toMeOH_A001_run3	6		2	12.4969	50.09	50.01	275	275	16	17	20.9209	95.98	24	0	79.97	0	0	0	160.13	96	24	0	80	0	0	0	159.98	0	64.99	35	65	35	0	0	35.28	785.03	150.15	240.53	179.99	179.98	29.82	150	250	180	180
3142	2023-01-24 09:21:13	2023-01-24 08:21:13	FALSE	230116_CO2toMeOH_A001_run3	6		2	12.5006	50.1	50	275	275	16	41	22.5541	96.01	23.99	0	80.01	0	0	0	160.21	96	24	0	80	0	0	0	159.98	0	65	35	65	35	0	0	35.44	784.97	150.01	239.09	179.98	179.97	29.66	150	250	180	180
3150	2023-01-24 11:15:43	2023-01-24 10:15:43	FALSE	230116_CO2toMeOH_A001_run3	6		2	12.4988	50.09	50	300.06	300	17	17	24.4623	95.99	24.01	0	79.98	0	0	0	160.05	96	24	0	80	0	0	0	159.98	0	65	35	65	35	0	0	35.69	784.71	149.88	237.63	180.03	180	30.48	150	250	180	180
3158	2023-01-24 12:53:42	2023-01-24 11:53:42	FALSE	230116_CO2toMeOH_A001_run3	6		2	12.5019	50.09	50	300	300	17	41	26.0955	96.01	24	0	80.02	0	0	0	159.98	96	24	0	80	0	0	0	159.98	0	64.99	35	65	35	0	0	35.77	784.6	150.03	238.54	180.01	180	30.6	150	250	180	180
3166	2023-01-24 14:32:46	2023-01-24 13:32:46	FALSE	230116_CO2toMeOH_A001_run3	6		2	12.4981	50.11	50	300.01	300	18	17	27.7464	96	23.99	0	79.98	0	0	0	159.94	96	24	0	80	0	0	0	159.98	0	65	35	65	35	0	0	35.82	784.66	149.95	237.02	179.93	180.05	30.66	150	250	180	180
3174	2023-01-24 16:10:45	2023-01-24 15:10:45	FALSE	230116_CO2toMeOH_A001_run3	6		2	12.4994	50.11	50	299.99	300	18	41	29.3797	95.99	24	0	80	0	0	0	160.05	96	24	0	80	0	0	0	159.98	0	65	35	65	35	0	0	35.7	784.66	150.02	238.69	179.95	180.02	30.63	150	250	180	180
3056	2023-01-23 15:00:09	2023-01-23 14:00:09	FALSE	230116_CO2toMeOH_A001_run3	7		2	12.5006	49.88	50	225	225	11	20	4.20284	96	24	0	80.01	0	0	0	124.21	96	24	0	80	0	0	0	159.98	0	65.04	35	65	35	0	0	35.17	785.13	149.9	237.73	180.08	180	27.6	150	250	180	180
3064	2023-01-23 16:38:08	2023-01-23 15:38:08	FALSE	230116_CO2toMeOH_A001_run3	7		2	12.4988	49.93	50	224.99	225	11	44	5.83608	96.01	23.99	0	79.98	0	0	0	160.44	96	24	0	80	0	0	0	159.98	0	65	35	65	35	0	0	35.25	785.11	149.91	239.37	180.03	180.01	27.61	150	250	180	180
3072	2023-01-23 18:17:13	2023-01-23 17:17:13	FALSE	230116_CO2toMeOH_A001_run3	7		2	12.5006	49.9	49.99	225.01	225	12	20	7.48735	95.98	23.99	0	80.04	0	0	0	159.9	96	24	0	80	0	0	0	159.98	0	65	35	65	35	0	0	35.25	785.09	150	240.51	179.99	180	27.55	150	250	180	180
3080	2023-01-23 19:55:12	2023-01-23 18:55:12	FALSE	230116_CO2toMeOH_A001_run3	7		2	12.5006	49.93	50.01	224.99	225	12	44	9.12055	96.01	24	0	80	0	0	0	159.82	96	24	0	80	0	0	0	159.98	0	65	35	65	35	0	0	35.23	785.29	149.92	239.98	179.93	179.98	27.69	150	250	180	180
3088	2023-01-23 21:49:11	2023-01-23 20:49:11	FALSE	230116_CO2toMeOH_A001_run3	7		2	12.4987	49.9	50	250.03	250	13	20	11.0202	96	23.99	0	79.99	0	0	0	159.67	96	24	0	80	0	0	0	159.98	0	65	35	65	35	0	0	35.31	785	149.91	241.17	180.02	179.99	28.61	150	250	180	180
3096	2023-01-23 23:27:11	2023-01-23 22:27:11	FALSE	230116_CO2toMeOH_A001_run3	7		2	12.4994	49.93	50.01	250	250	13	44	12.6535	96	23.99	0	80	0	0	0	159.94	96	24	0	80	0	0	0	159.98	0	64.99	35	65	35	0	0	35.33	785	150.04	240.62	179.99	180.01	28.64	150	250	180	180
3103	2023-01-24 01:06:15	2023-01-24 00:06:15	FALSE	230116_CO2toMeOH_A001_run3	7		2	12.4988	49.93	50.01	249.99	250	14	20	14.3045	96	24	0	79.98	0	0	0	159.82	96	24	0	80	0	0	0	159.98	0	65	35	65	35	0	0	35.28	785.02	149.78	240.78	179.97	179.91	28.64	150	250	180	180
3111	2023-01-24 02:44:14	2023-01-24 01:44:14	FALSE	230116_CO2toMeOH_A001_run3	7		2	12.4975	49.93	49.99	249.98	250	14	44	15.9377	95.99	23.99	0	79.98	0	0	0	160.05	96	24	0	80	0	0	0	159.98	0	65	35	65	35	0	0	35.2	785.34	149.84	239.87	180.01	179.95	28.78	150	250	180	180
3119	2023-01-24 04:38:25	2023-01-24 03:38:25	FALSE	230116_CO2toMeOH_A001_run3	7		2	12.4994	49.94	49.98	275.02	275	15	20	17.8409	96	24	0	79.99	0	0	0	159.78	96	24	0	80	0	0	0	159.98	0	65	35	65	35	0	0	35.3	785.01	150.04	238.62	180.01	179.94	29.63	150	250	180	180
3127	2023-01-24 06:16:25	2023-01-24 05:16:25	FALSE	230116_CO2toMeOH_A001_run3	7		2	12.5031	49.94	50	274.98	275	15	44	19.4741	96.02	24	0	80.03	0	0	0	159.94	96	24	0	80	0	0	0	159.98	0	65	35	65	35	0	0	35.39	785.14	150.01	236.16	180	179.99	29.71	150	250	180	180
3135	2023-01-24 07:55:29	2023-01-24 06:55:29	FALSE	230116_CO2toMeOH_A001_run3	7		2	12.5	49.97	50.01	274.99	275	16	20	21.1251	96	24	0	80	0	0	0	159.94	96	24	0	80	0	0	0	159.98	0	65	35	65	35	0	0	35.28	785.06	150.09	239.84	180.06	180.01	29.81	150	250	180	180
3143	2023-01-24 09:33:28	2023-01-24 08:33:28	FALSE	230116_CO2toMeOH_A001_run3	7		2	12.5	49.93	50.02	275.01	275	16	44	22.7583	96	24.01	0	79.99	0	0	0	160.13	96	24	0	80	0	0	0	159.98	0	65	35	65	35	0	0	35.47	785.06	150.29	241.1	179.95	179.96	29.69	150	250	180	180
3151	2023-01-24 11:27:58	2023-01-24 10:27:58	FALSE	230116_CO2toMeOH_A001_run3	7		2	12.4994	49.92	49.99	300.02	300	17	20	24.6664	96	23.99	0	80	0	0	0	159.9	96	24	0	80	0	0	0	159.98	0	65	35	65	35	0	0	35.73	784.63	149.86	235.6	180	180	30.45	150	250	180	180
3159	2023-01-24 13:05:57	2023-01-24 12:05:57	FALSE	230116_CO2toMeOH_A001_run3	7		2	12.5012	49.91	50	300	300	17	44	26.2997	96	24	0	80.02	0	0	0	159.71	96	24	0	80	0	0	0	159.98	0	65	34.99	65	35	0	0	35.78	784.78	150.01	236.63	179.94	179.96	30.62	150	250	180	180
3167	2023-01-24 14:45:01	2023-01-24 13:45:01	FALSE	230116_CO2toMeOH_A001_run3	7		2	12.5	49.98	50.01	299.98	300	18	20	27.9506	95.99	24.01	0	80	0	0	0	160.02	96	24	0	80	0	0	0	159.98	0	65	35	65	35	0	0	35.83	784.58	150.04	239.39	179.99	180	30.59	150	250	180	180
3175	2023-01-24 16:23:00	2023-01-24 15:23:00	FALSE	230116_CO2toMeOH_A001_run3	7		2	12.4994	49.95	50.01	300	300	18	44	29.5838	96	23.99	0	80	0	0	0	159.98	96	24	0	80	0	0	0	159.98	0	65	35	65	35	0	0	35.67	784.86	150	238.11	179.99	179.93	30.65	150	250	180	180
3057	2023-01-23 15:12:24	2023-01-23 14:12:24	FALSE	230116_CO2toMeOH_A001_run3	8		2	12.4987	50.06	49.99	225.01	225	11	23	4.407	95.99	23.99	0	80	0	0	0	159.05	96	24	0	80	0	0	0	159.98	0	65	35	65	35	0	0	35.19	785.34	150.14	238.62	180	179.97	27.57	150	250	180	180
3065	2023-01-23 16:50:23	2023-01-23 15:50:23	FALSE	230116_CO2toMeOH_A001_run3	8		2	12.5006	50.11	49.99	224.99	225	11	47	6.04023	95.99	24	0	80.02	0	0	0	159.86	96	24	0	80	0	0	0	159.98	0	65	35	65	35	0	0	35.25	785.23	150.29	237.91	179.99	180	27.55	150	250	180	180
3073	2023-01-23 18:29:28	2023-01-23 17:29:28	FALSE	230116_CO2toMeOH_A001_run3	8		2	12.5006	50.15	50	225.01	225	12	23	7.69151	96	24.01	0	80	0	0	0	160.02	96	24	0	80	0	0	0	159.98	0	65	35	65	35	0	0	35.22	785.07	149.95	238.89	179.98	179.94	27.69	150	250	180	180
3081	2023-01-23 20:07:27	2023-01-23 19:07:27	FALSE	230116_CO2toMeOH_A001_run3	8		2	12.4994	50.13	49.99	225	225	12	47	9.3247	96	24	0	79.99	0	0	0	159.94	96	24	0	80	0	0	0	159.98	0	65	35	65	35	0	0	35.26	785.22	149.91	238.82	179.98	180.05	27.66	150	250	180	180
3089	2023-01-23 22:01:26	2023-01-23 21:01:26	FALSE	230116_CO2toMeOH_A001_run3	8		2	12.4981	50.14	50	250.03	250	13	23	11.2244	96	24.01	0	79.96	0	0	0	160.05	96	24	0	80	0	0	0	159.98	0	64.99	35	65	35	0	0	35.32	785.24	150.09	237.06	179.94	179.98	28.49	150	250	180	180
3097	2023-01-23 23:39:26	2023-01-23 22:39:26	FALSE	230116_CO2toMeOH_A001_run3	8		2	12.4994	50.12	49.99	250.01	250	13	47	12.8576	95.99	24	0	80	0	0	0	159.67	96	24	0	80	0	0	0	159.98	0	65	35	65	35	0	0	35.31	785.15	150.15	237.57	179.97	179.98	28.77	150	250	180	180
3104	2023-01-24 01:18:30	2023-01-24 00:18:30	FALSE	230116_CO2toMeOH_A001_run3	8		2	12.4956	50.1	50.01	250.01	250	14	23	14.5087	95.99	24	0	79.94	0	0	0	159.82	96	24	0	80	0	0	0	159.98	0	64.99	35	65	35	0	0	35.25	785.05	149.98	236.75	180.03	180.02	28.71	150	250	180	180
3112	2023-01-24 02:56:29	2023-01-24 01:56:29	FALSE	230116_CO2toMeOH_A001_run3	8		2	12.5	50.12	50	249.99	250	14	47	16.1419	96.01	24	0	79.99	0	0	0	159.78	96	24	0	80	0	0	0	159.98	0	65	35	65	35	0	0	35.19	785.33	150.14	241.8	180	179.99	28.91	150	250	180	180
3120	2023-01-24 04:50:40	2023-01-24 03:50:40	FALSE	230116_CO2toMeOH_A001_run3	8		2	12.495	50.07	50.01	275.02	275	15	23	18.045	95.99	23.99	0	79.94	0	0	0	160.21	96	24	0	80	0	0	0	159.98	0	65	35	65	35	0	0	35.32	784.99	150.13	238.75	180.02	179.96	29.66	150	250	180	180
3128	2023-01-24 06:28:40	2023-01-24 05:28:40	FALSE	230116_CO2toMeOH_A001_run3	8		2	12.4994	50.12	50	275.02	275	15	47	19.6783	96.02	23.99	0	79.98	0	0	0	159.9	96	24	0	80	0	0	0	159.98	0	65	34.99	65	35	0	0	35.38	784.93	150.06	238.56	179.96	180.02	29.69	150	250	180	180
3136	2023-01-24 08:07:44	2023-01-24 07:07:44	FALSE	230116_CO2toMeOH_A001_run3	8		2	12.4956	50.09	50	275	275	16	23	21.3292	95.99	23.99	0	79.95	0	0	0	160.02	96	24	0	80	0	0	0	159.98	0	65	35	65	35	0	0	35.31	785.1	150.11	239.61	180.01	180.02	29.85	150	250	180	180
3144	2023-01-24 09:45:43	2023-01-24 08:45:43	FALSE	230116_CO2toMeOH_A001_run3	8		2	12.5019	50.11	50	275.01	275	16	47	22.9624	96	24	0	80.03	0	0	0	160.02	96	24	0	80	0	0	0	159.98	0	65	35	65	35	0	0	35.47	784.88	150.07	239.38	179.97	180.04	29.72	150	250	180	180
3152	2023-01-24 11:40:12	2023-01-24 10:40:12	FALSE	230116_CO2toMeOH_A001_run3	8		2	12.4994	50.12	50.01	300.02	300	17	23	24.8706	96	24	0	79.99	0	0	0	159.86	96	24	0	80	0	0	0	159.98	0	65.01	35	65	35	0	0	35.73	784.82	149.95	236.06	180.05	180.03	30.57	150	250	180	180
3160	2023-01-24 13:18:12	2023-01-24 12:18:12	FALSE	230116_CO2toMeOH_A001_run3	8		2	12.5	50.16	50.02	300.01	300	17	47	26.5038	96	24	0	80	0	0	0	160.02	96	24	0	80	0	0	0	159.98	0	65	35	65	35	0	0	35.78	784.82	150	238.92	179.96	179.98	30.67	150	250	180	180
3168	2023-01-24 14:57:15	2023-01-24 13:57:15	FALSE	230116_CO2toMeOH_A001_run3	8		2	12.5006	50.1	49.99	300.02	300	18	23	28.1548	96	24	0	80.01	0	0	0	160.02	96	24	0	80	0	0	0	159.98	0	64.99	35.01	65	35	0	0	35.82	784.76	150.05	238.83	180.06	179.99	30.64	150	250	180	180
3176	2023-01-24 16:35:15	2023-01-24 15:35:15	FALSE	230116_CO2toMeOH_A001_run3	8		2	12.4981	50.1	50	300	300	18	47	29.788	96.01	24	0	79.96	0	0	0	159.9	96	24	0	80	0	0	0	159.98	0	65.01	35	65	35	0	0	35.64	784.95	150.07	238.94	179.98	180.02	30.58	150	250	180	180
3050	2023-01-23 13:46:39	2023-01-23 12:46:39	FALSE	230116_CO2toMeOH_A001_run3	9		3	12.5294	50.06	50.01	225.03	225	11	2	2.97792	96	24	0.47	80	0	0	0	160.21	96	24	0	80	0	0	0	159.98	0	65	35	65	35	0	0	35.14	785.28	150.26	243.56	180.02	180	27.47	150	250	180	180
3058	2023-01-23 15:24:39	2023-01-23 14:24:39	FALSE	230116_CO2toMeOH_A001_run3	9		3	12.66	50	50	225	225	11	26	4.61118	96.01	23.99	2.56	80	0	0	0	162.56	96	24	0	80	0	0	0	159.98	0	64.99	34.99	65	35	0	0	35.2	785.31	149.94	241.03	180.11	180.1	27.65	150	250	180	180
3066	2023-01-23 17:03:43	2023-01-23 16:03:43	FALSE	230116_CO2toMeOH_A001_run3	9		3	12.4988	50.08	50	225.02	225	12	2	6.26243	96	24	0	79.98	0	0	0	159.94	96	24	0	80	0	0	0	159.98	0	65	35	65	35	0	0	35.27	785.1	149.73	236.69	180	179.93	27.6	150	250	180	180
3074	2023-01-23 18:41:43	2023-01-23 17:41:43	FALSE	230116_CO2toMeOH_A001_run3	9		3	12.5	50.08	50.01	225	225	12	26	7.89566	96.02	23.99	0	79.99	0	0	0	159.94	96	24	0	80	0	0	0	159.98	0	65	35	65	35	0	0	35.23	785.32	150.05	242.26	179.93	180.03	27.6	150	250	180	180
3082	2023-01-23 20:35:42	2023-01-23 19:35:42	FALSE	230116_CO2toMeOH_A001_run3	9		3	12.5	50.06	50.01	251.39	250	13	2	9.79533	96	24	0	80	0	0	0	159.78	96	24	0	80	0	0	0	159.98	0	65	35	65	35	0	0	35.27	785.27	149.99	238.24	180.1	180.08	28.13	150	250	180	180
3090	2023-01-23 22:13:41	2023-01-23 21:13:41	FALSE	230116_CO2toMeOH_A001_run3	9		3	12.5006	50.03	50.02	250.02	250	13	26	11.4285	96	24	0	80.01	0	0	0	159.94	96	24	0	80	0	0	0	159.98	0	64.99	35	65	35	0	0	35.35	784.95	150.01	239.06	180.09	180.1	28.66	150	250	180	180
3098	2023-01-23 23:52:45	2023-01-23 22:52:45	FALSE	230116_CO2toMeOH_A001_run3	9		3	12.5212	50.1	50.02	250	250	14	2	13.0795	96	23.99	0.35	80	0	0	0	160.09	96	24	0	80	0	0	0	159.98	0	65.01	35	65	35	0	0	35.33	785.09	150.11	238.83	179.91	179.93	28.82	150	250	180	180
3105	2023-01-24 01:30:45	2023-01-24 00:30:45	FALSE	230116_CO2toMeOH_A001_run3	9		3	12.5238	50.03	50	250.01	250	14	26	14.7128	96.01	24	0.36	80.01	0	0	0	160.25	96	24	0	80	0	0	0	159.98	0	65	35	65	35	0	0	35.28	785.23	150.11	241.94	180.01	180.01	28.71	150	250	180	180
3113	2023-01-24 03:24:56	2023-01-24 02:24:56	FALSE	230116_CO2toMeOH_A001_run3	9		3	12.4994	50.01	50	276.33	275	15	2	16.6159	95.99	24.01	0	79.99	0	0	0	159.82	96	24	0	80	0	0	0	159.98	0	65	35	65	35	0	0	35.2	785.29	150.07	238.24	179.99	180.03	29.47	150	250	180	180
3121	2023-01-24 05:02:55	2023-01-24 04:02:55	FALSE	230116_CO2toMeOH_A001_run3	9		3	12.5	50.06	50	275.01	275	15	26	18.2492	96	24	0	80	0	0	0	160.02	96	24	0	80	0	0	0	159.98	0	64.99	35	65	35	0	0	35.31	785.12	150.11	239.25	180.03	179.96	29.75	150	250	180	180
3129	2023-01-24 06:41:59	2023-01-24 05:41:59	FALSE	230116_CO2toMeOH_A001_run3	9		3	12.5	50.03	50	275.01	275	16	2	19.9002	95.99	24	0	80.01	0	0	0	160.13	96	24	0	80	0	0	0	159.98	0	65	35	65	35	0	0	35.37	785.2	149.92	239.62	180.03	180.03	29.69	150	250	180	180
3137	2023-01-24 08:19:59	2023-01-24 07:19:59	FALSE	230116_CO2toMeOH_A001_run3	9		3	12.4981	50.1	50	275.01	275	16	26	21.5334	95.99	23.99	0	79.99	0	0	0	160.02	96	24	0	80	0	0	0	159.98	0	64.99	35	65	35	0	0	35.3	785.16	150.16	237.87	179.96	180.01	29.77	150	250	180	180
3145	2023-01-24 10:14:28	2023-01-24 09:14:28	FALSE	230116_CO2toMeOH_A001_run3	9		3	12.4956	50.01	49.99	301.27	300	17	2	23.4415	96	24	0	79.93	0	0	0	160.25	96	24	0	80	0	0	0	159.98	0	64.99	35	65	35	0	0	35.53	784.85	149.83	238.48	179.99	179.98	30.23	150	250	180	180
3153	2023-01-24 11:52:27	2023-01-24 10:52:27	FALSE	230116_CO2toMeOH_A001_run3	9		3	12.4994	50.11	50	300.02	300	17	26	25.0747	95.99	24	0	80	0	0	0	159.9	96	24	0	80	0	0	0	159.98	0	65	35	65	35	0	0	35.72	784.66	149.89	238.06	180.02	179.95	30.54	150	250	180	180
3161	2023-01-24 13:31:31	2023-01-24 12:31:31	FALSE	230116_CO2toMeOH_A001_run3	9		3	12.5087	50.01	49.99	300.02	300	18	2	26.7257	95.99	24	0.11	80.04	0	0	0	160.21	96	24	0	80	0	0	0	159.98	0	65.01	35	65	35	0	0	35.8	784.73	150.04	241.68	179.91	179.94	30.6	150	250	180	180
3169	2023-01-24 15:09:30	2023-01-24 14:09:30	FALSE	230116_CO2toMeOH_A001_run3	9		3	12.4987	50	49.99	300	300	18	26	28.3589	95.99	23.99	0	80	0	0	0	159.86	96	24	0	80	0	0	0	159.98	0	65	35	65	35	0	0	35.82	784.84	150.1	239.33	179.99	180.04	30.51	150	250	180	180
3051	2023-01-23 13:58:54	2023-01-23 12:58:54	FALSE	230116_CO2toMeOH_A001_run3	10		3	12.5	50.1	50	225.02	225	11	5	3.18204	96	24	0	80	0	0	0	159.44	96	24	0	80	0	0	0	159.98	0	65	35	65	35	0	0	35.17	785.35	150.05	237.09	180.04	180.02	27.43	150	250	180	180
3059	2023-01-23 15:36:54	2023-01-23 14:36:54	FALSE	230116_CO2toMeOH_A001_run3	10		3	12.4994	50.04	50	225.01	225	11	29	4.81534	96.01	24	0	79.98	0	0	0	160.21	96	24	0	80	0	0	0	159.98	0	65	35	65	35	0	0	35.21	785.33	150.16	241.59	180.04	180.01	27.6	150	250	180	180
3067	2023-01-23 17:15:58	2023-01-23 16:15:58	FALSE	230116_CO2toMeOH_A001_run3	10		3	12.5012	50.05	50	225.02	225	12	5	6.46659	96	24	0	80.02	0	0	0	160.13	96	24	0	80	0	0	0	159.98	0	65	35	65	35	0	0	35.26	785.24	149.94	241.4	179.96	179.98	27.6	150	250	180	180
3075	2023-01-23 18:53:58	2023-01-23 17:53:58	FALSE	230116_CO2toMeOH_A001_run3	10		3	12.4994	50.04	50	225.02	225	12	29	8.09981	96	24.01	0	79.98	0	0	0	159.82	96	24	0	80	0	0	0	159.98	0	65	35	65	35	0	0	35.22	785.33	149.91	238.49	180.03	179.98	27.59	150	250	180	180
3083	2023-01-23 20:47:57	2023-01-23 19:47:57	FALSE	230116_CO2toMeOH_A001_run3	10		3	12.4963	50.05	50	250.75	250	13	5	9.99949	95.99	23.99	0	79.96	0	0	0	159.98	96	24	0	80	0	0	0	159.98	0	65	35	65	35	0	0	35.28	785.15	149.95	240.93	180.04	180.06	28.36	150	250	180	180
3091	2023-01-23 22:25:56	2023-01-23 21:25:56	FALSE	230116_CO2toMeOH_A001_run3	10		3	12.5	50.03	50	250.01	250	13	29	11.6327	96	24	0	80	0	0	0	159.75	96	24	0	80	0	0	0	159.98	0	65	35	65	35	0	0	35.34	785.2	150.07	241.05	180.03	180.05	28.57	150	250	180	180
3106	2023-01-24 01:43:00	2023-01-24 00:43:00	FALSE	230116_CO2toMeOH_A001_run3	10		3	12.4981	50.02	50	249.99	250	14	29	14.917	95.99	23.99	0	79.99	0	0	0	159.9	96	24	0	80	0	0	0	159.98	0	65	35	65	35	0	0	35.28	785.14	149.99	240.29	179.95	179.98	28.78	150	250	180	180
3114	2023-01-24 03:37:11	2023-01-24 02:37:11	FALSE	230116_CO2toMeOH_A001_run3	10		3	12.5006	50.04	50	275.76	275	15	5	16.8201	95.99	24.01	0	80.01	0	0	0	160.25	96	24	0	80	0	0	0	159.98	0	65	35	65	35	0	0	35.2	785.31	149.98	238.62	179.99	179.97	29.46	150	250	180	180
3122	2023-01-24 05:15:10	2023-01-24 04:15:10	FALSE	230116_CO2toMeOH_A001_run3	10		3	12.5	49.98	49.99	275.01	275	15	29	18.4533	96	24	0	80	0	0	0	160.09	96	24	0	80	0	0	0	159.98	0	64.99	35	65	35	0	0	35.31	784.98	150.11	238.13	180.07	180.03	29.72	150	250	180	180
3130	2023-01-24 06:54:14	2023-01-24 05:54:14	FALSE	230116_CO2toMeOH_A001_run3	10		3	12.5019	50.02	50	275	275	16	5	20.1043	96.01	23.99	0	80.03	0	0	0	159.82	96	24	0	80	0	0	0	159.98	0	64.99	35	65	35	0	0	35.34	785.02	150.31	235.86	180	180.02	29.63	150	250	180	180
3138	2023-01-24 08:32:14	2023-01-24 07:32:14	FALSE	230116_CO2toMeOH_A001_run3	10		3	12.4994	50.06	50	274.99	275	16	29	21.7375	96	23.99	0	80	0	0	0	160.09	96	24	0	80	0	0	0	159.98	0	65	35	65	35	0	0	35.31	785.01	149.88	237.36	180	179.92	29.8	150	250	180	180
3146	2023-01-24 10:26:43	2023-01-24 09:26:43	FALSE	230116_CO2toMeOH_A001_run3	10		3	12.5006	50.04	49.99	300.75	300	17	5	23.6457	96.01	24	0	80	0	0	0	159.86	96	24	0	80	0	0	0	159.98	0	65	35	65	35	0	0	35.56	785.01	150.11	238.48	179.83	179.87	30.21	150	250	180	180
3154	2023-01-24 12:04:42	2023-01-24 11:04:42	FALSE	230116_CO2toMeOH_A001_run3	10		3	12.4981	50.01	50	300.01	300	17	29	25.2789	95.99	24	0	79.98	0	0	0	159.94	96	24	0	80	0	0	0	159.98	0	65	35	65	35	0	0	35.74	784.8	150.08	239.63	180.02	179.99	30.59	150	250	180	180
3162	2023-01-24 13:43:46	2023-01-24 12:43:46	FALSE	230116_CO2toMeOH_A001_run3	10		3	12.4994	50.06	50	300.01	300	18	5	26.9299	95.99	24	0	80	0	0	0	160.05	96	24	0	80	0	0	0	159.98	0	65	35	65	35	0	0	35.79	784.84	150.05	237.04	180.03	180.02	30.66	150	250	180	180
3170	2023-01-24 15:21:45	2023-01-24 14:21:45	FALSE	230116_CO2toMeOH_A001_run3	10		3	12.505	50.06	50.01	300.01	300	18	29	28.5631	96.02	24.01	0	80.05	0	0	0	159.94	96	24	0	80	0	0	0	159.98	0	64.99	35	65	35	0	0	35.79	784.69	150.09	239.72	180.02	180.03	30.66	150	250	180	180
3052	2023-01-23 14:11:09	2023-01-23 13:11:09	FALSE	230116_CO2toMeOH_A001_run3	11		3	12.5012	50.01	50	225.01	225	11	8	3.38618	96.02	24	0	80	0	0	0	161.63	96	24	0	80	0	0	0	159.98	0	65	35	65	35	0	0	35.18	785.35	149.88	237	180.02	179.99	27.49	150	250	180	180
3060	2023-01-23 15:49:09	2023-01-23 14:49:09	FALSE	230116_CO2toMeOH_A001_run3	11		3	12.5006	49.93	50.01	225.01	225	11	32	5.01947	96.01	24	0	80	0	0	0	159.98	96	24	0	80	0	0	0	159.98	0	65	35	65	35	0	0	35.22	785.3	149.82	238.33	180.06	180	27.68	150	250	180	180
3068	2023-01-23 17:28:13	2023-01-23 16:28:13	FALSE	230116_CO2toMeOH_A001_run3	11		3	12.4988	49.94	50.02	224.98	225	12	8	6.67074	96	24	0	79.98	0	0	0	159.78	96	24	0	80	0	0	0	159.98	0	65.01	35	65	35	0	0	35.27	785.06	150.09	242.01	180	180.02	27.58	150	250	180	180
3076	2023-01-23 19:06:13	2023-01-23 18:06:13	FALSE	230116_CO2toMeOH_A001_run3	11		3	12.4988	49.96	50	225.02	225	12	32	8.30396	96	24	0	79.98	0	0	0	159.82	96	24	0	80	0	0	0	159.98	0	64.99	34.99	65	35	0	0	35.22	785.31	149.84	238.49	180.02	179.99	27.69	150	250	180	180
3084	2023-01-23 21:00:11	2023-01-23 20:00:11	FALSE	230116_CO2toMeOH_A001_run3	11		3	12.4981	49.95	50.01	250.29	250	13	8	10.2036	95.99	24	0	79.98	0	0	0	159.9	96	24	0	80	0	0	0	159.98	0	65	35	65	35	0	0	35.31	785.26	149.87	240.88	179.96	179.95	28.37	150	250	180	180
3092	2023-01-23 22:38:11	2023-01-23 21:38:11	FALSE	230116_CO2toMeOH_A001_run3	11		3	12.5	49.97	50	250.03	250	13	32	11.8368	96	24	0	80	0	0	0	160.17	96	24	0	80	0	0	0	159.98	0	65	35	65	35	0	0	35.3	785.06	150.11	238.04	179.99	179.97	28.56	150	250	180	180
3099	2023-01-24 00:17:15	2023-01-23 23:17:15	FALSE	230116_CO2toMeOH_A001_run3	11		3	12.5	49.96	50	250.01	250	14	8	13.4878	96	24	0	80	0	0	0	159.9	96	24	0	80	0	0	0	159.98	0	64.99	35	65	35	0	0	35.34	785.17	150.06	239.33	180.03	180.06	28.75	150	250	180	180
3107	2023-01-24 01:55:14	2023-01-24 00:55:14	FALSE	230116_CO2toMeOH_A001_run3	11		3	12.5	49.93	50	250.01	250	14	32	15.1211	96	24.01	0	79.99	0	0	0	160.05	96	24	0	80	0	0	0	159.98	0	65.01	35	65	35	0	0	35.25	785.14	150.19	237.83	180.01	180	28.67	150	250	180	180
3115	2023-01-24 03:49:26	2023-01-24 02:49:26	FALSE	230116_CO2toMeOH_A001_run3	11		3	12.4975	49.95	49.99	275.3	275	15	8	17.0242	95.99	24	0	79.97	0	0	0	159.55	96	24	0	80	0	0	0	159.98	0	65	35	65	35	0	0	35.22	785.18	150.09	237.99	180.01	180.03	29.48	150	250	180	180
3123	2023-01-24 05:27:25	2023-01-24 04:27:25	FALSE	230116_CO2toMeOH_A001_run3	11		3	12.5013	49.91	50	275.01	275	15	32	18.6575	96.01	24.01	0	80	0	0	0	159.94	96	24	0	80	0	0	0	159.98	0	65	35	65	35	0	0	35.33	785.19	149.87	239.49	180.02	180.01	29.73	150	250	180	180
3131	2023-01-24 07:06:29	2023-01-24 06:06:29	FALSE	230116_CO2toMeOH_A001_run3	11		3	12.4969	49.96	50.01	275	275	16	8	20.3085	96	23.99	0	79.96	0	0	0	159.9	96	24	0	80	0	0	0	159.98	0	65	35	65	35	0	0	35.34	784.96	149.98	239.31	180	180.03	29.75	150	250	180	180
3139	2023-01-24 08:44:28	2023-01-24 07:44:28	FALSE	230116_CO2toMeOH_A001_run3	11		3	12.4981	49.96	50	275.01	275	16	32	21.9417	96	24.01	0	79.96	0	0	0	159.9	96	24	0	80	0	0	0	159.98	0	65	35	65	35	0	0	35.35	785	149.88	239.95	180.04	179.97	29.73	150	250	180	180
3147	2023-01-24 10:38:58	2023-01-24 09:38:58	FALSE	230116_CO2toMeOH_A001_run3	11		3	12.5	49.92	50	300.32	300	17	8	23.8498	96	24	0	80	0	0	0	159.78	96	24	0	80	0	0	0	159.98	0	65	35	65	35	0	0	35.6	784.99	149.87	235.95	179.96	179.98	30.29	150	250	180	180
3155	2023-01-24 12:16:57	2023-01-24 11:16:57	FALSE	230116_CO2toMeOH_A001_run3	11		3	12.4919	49.84	49.92	300.02	300	17	32	25.4831	96	24.01	0	79.86	0	0	0	160.13	96	24	0	80	0	0	0	159.98	0	65	35	65	35	0	0	35.75	784.69	150.21	239.62	179.93	180	30.5	150	250	180	180
3163	2023-01-24 13:56:01	2023-01-24 12:56:01	FALSE	230116_CO2toMeOH_A001_run3	11		3	12.5	49.93	50.02	299.99	300	18	8	27.134	96.01	23.99	0	80	0	0	0	159.82	96	24	0	80	0	0	0	159.98	0	65	35	65	35	0	0	35.79	784.58	150.08	239.22	179.93	179.96	30.74	150	250	180	180
3171	2023-01-24 15:34:00	2023-01-24 14:34:00	FALSE	230116_CO2toMeOH_A001_run3	11		3	12.4994	49.95	49.99	300	300	18	32	28.7672	95.99	24	0	80	0	0	0	159.94	96	24	0	80	0	0	0	159.98	0	64.99	35	65	35	0	0	35.77	784.59	149.87	238	179.98	179.99	30.56	150	250	180	180
3053	2023-01-23 14:23:24	2023-01-23 13:23:24	FALSE	230116_CO2toMeOH_A001_run3	12		3	12.5019	49.98	50.01	225.03	225	11	11	3.59036	96.02	23.99	0	80.02	0	0	0	160.59	96	24	0	80	0	0	0	159.98	0	65	35	65	35	0	0	35.16	785.15	149.92	240.5	180	180.02	27.47	150	250	180	180
3061	2023-01-23 16:01:23	2023-01-23 15:01:23	FALSE	230116_CO2toMeOH_A001_run3	12		3	12.5006	49.96	50	224.99	225	11	35	5.22362	96.01	24	0	80	0	0	0	159.94	96	24	0	80	0	0	0	159.98	0	65	35	65	35	0	0	35.24	785.28	149.8	238.53	179.99	180.02	27.54	150	250	180	180
3069	2023-01-23 17:40:28	2023-01-23 16:40:28	FALSE	230116_CO2toMeOH_A001_run3	12		3	12.5	50	49.99	224.99	225	12	11	6.87488	96	24	0	80	0	0	0	159.98	96	24	0	80	0	0	0	159.98	0	65	35	65	35	0	0	35.27	785.05	150.03	238.14	180.09	179.97	27.57	150	250	180	180
3077	2023-01-23 19:18:28	2023-01-23 18:18:28	FALSE	230116_CO2toMeOH_A001_run3	12		3	12.5006	49.96	50.01	224.98	225	12	35	8.50811	96.01	24	0	80	0	0	0	160.05	96	24	0	80	0	0	0	159.98	0	65	35	65	35	0	0	35.22	785.11	150.04	239.66	179.91	179.98	27.53	150	250	180	180
3085	2023-01-23 21:12:26	2023-01-23 20:12:26	FALSE	230116_CO2toMeOH_A001_run3	12		3	12.4975	49.99	50	250.11	250	13	11	10.4078	95.98	24	0	79.98	0	0	0	160.05	96	24	0	80	0	0	0	159.98	0	65	35	65	35	0	0	35.31	784.98	150.14	240.35	179.95	179.96	28.51	150	250	180	180
3093	2023-01-23 22:50:26	2023-01-23 21:50:26	FALSE	230116_CO2toMeOH_A001_run3	12		3	12.4994	49.99	49.99	250.01	250	13	35	12.041	96.01	24	0	79.98	0	0	0	160.05	96	24	0	80	0	0	0	159.98	0	65	35	65	35	0	0	35.33	785.15	150.11	239.57	180.07	180.03	28.64	150	250	180	180
3100	2023-01-24 00:29:30	2023-01-23 23:29:30	FALSE	230116_CO2toMeOH_A001_run3	12		3	12.5	49.95	50	250	250	14	11	13.692	96	24	0	80	0	0	0	159.9	96	24	0	80	0	0	0	159.98	0	65	35	65	35	0	0	35.34	785	149.93	241.12	180.02	180.05	28.67	150	250	180	180
3108	2023-01-24 02:07:29	2023-01-24 01:07:29	FALSE	230116_CO2toMeOH_A001_run3	12		3	12.4994	49.95	50	249.99	250	14	35	15.3253	95.99	24	0	80	0	0	0	159.78	96	24	0	80	0	0	0	159.98	0	65	35	65	35	0	0	35.24	785.17	149.92	238.89	179.96	179.95	28.75	150	250	180	180
3116	2023-01-24 04:01:41	2023-01-24 03:01:41	FALSE	230116_CO2toMeOH_A001_run3	12		3	12.5	49.97	50	275.13	275	15	11	17.2284	96.01	24	0	79.99	0	0	0	159.9	96	24	0	80	0	0	0	159.98	0	65	35	65	35	0	0	35.25	785.03	150.02	239.5	180.02	179.97	29.59	150	250	180	180
3124	2023-01-24 05:39:40	2023-01-24 04:39:40	FALSE	230116_CO2toMeOH_A001_run3	12		3	12.5006	49.98	49.99	275.04	275	15	35	18.8616	96.01	23.99	0	80.01	0	0	0	159.9	96	24	0	80	0	0	0	159.98	0	65.01	35	65	35	0	0	35.32	785.23	149.94	239.47	179.97	179.96	29.79	150	250	180	180
3132	2023-01-24 07:18:44	2023-01-24 06:18:44	FALSE	230116_CO2toMeOH_A001_run3	12		3	12.5	49.96	50.02	275	275	16	11	20.5126	95.99	24.01	0	80	0	0	0	159.9	96	24	0	80	0	0	0	159.98	0	65	35	65	35	0	0	35.31	785.22	149.84	241.32	180	179.96	29.65	150	250	180	180
3140	2023-01-24 08:56:43	2023-01-24 07:56:43	FALSE	230116_CO2toMeOH_A001_run3	12		3	12.4987	49.93	50.01	275	275	16	35	22.1458	95.99	23.99	0	80	0	0	0	160.17	96	24	0	80	0	0	0	159.98	0	64.99	35	65	35	0	0	35.37	785.19	150.06	240.66	179.99	179.98	29.56	150	250	180	180
3148	2023-01-24 10:51:13	2023-01-24 09:51:13	FALSE	230116_CO2toMeOH_A001_run3	12		3	12.5006	49.95	50.01	300.13	300	17	11	24.054	96.01	24	0	80	0	0	0	159.86	96	24	0	80	0	0	0	159.98	0	64.99	35	65	35	0	0	35.66	784.71	149.97	241.36	179.98	179.9	30.38	150	250	180	180
3156	2023-01-24 12:29:12	2023-01-24 11:29:12	FALSE	230116_CO2toMeOH_A001_run3	12		3	12.5	49.96	50.01	300.01	300	17	35	25.6872	95.99	24	0	80.01	0	0	0	159.9	96	24	0	80	0	0	0	159.98	0	65	35	65	35	0	0	35.76	784.76	149.91	241.86	180	180.03	30.54	150	250	180	180
3164	2023-01-24 14:08:16	2023-01-24 13:08:16	FALSE	230116_CO2toMeOH_A001_run3	12		3	12.4994	49.95	50.01	300	300	18	11	27.3382	96	23.99	0	80	0	0	0	159.9	96	24	0	80	0	0	0	159.98	0	64.99	35	65	35	0	0	35.8	784.59	149.89	237.7	179.94	179.97	30.74	150	250	180	180
3172	2023-01-24 15:46:15	2023-01-24 14:46:15	FALSE	230116_CO2toMeOH_A001_run3	12		3	12.4969	49.95	49.99	300	300	18	35	28.9714	96	23.99	0	79.96	0	0	0	160.13	96	24	0	80	0	0	0	159.98	0	64.99	35	65	35	0	0	35.77	784.79	150.14	236.77	180.02	179.99	30.69	150	250	180	180
3054	2023-01-23 14:35:39	2023-01-23 13:35:39	FALSE	230116_CO2toMeOH_A001_run3	13		4	12.4988	50	50	225	225	11	14	3.79451	95.98	24	0	80	0	0	0	160.05	96	24	0	80	0	0	0	159.98	0	65	35	65	35	0	0	35.13	785.39	149.85	240.35	180.01	180	27.56	150	250	180	180
3062	2023-01-23 16:13:38	2023-01-23 15:13:38	FALSE	230116_CO2toMeOH_A001_run3	13		4	12.5	49.95	50	225	225	11	38	5.42777	96	24	0	80	0	0	0	160.21	96	24	0	80	0	0	0	159.98	0	65	34.99	65	35	0	0	35.24	785.25	149.98	239.1	179.97	179.9	27.41	150	250	180	180
3070	2023-01-23 17:52:43	2023-01-23 16:52:43	FALSE	230116_CO2toMeOH_A001_run3	13		4	12.5006	49.96	50	225	225	12	14	7.07904	96	24	0	80.01	0	0	0	160.29	96	24	0	80	0	0	0	159.98	0	65	35	65	35	0	0	35.27	785.08	149.93	240.03	179.99	179.98	27.7	150	250	180	180
3078	2023-01-23 19:30:43	2023-01-23 18:30:43	FALSE	230116_CO2toMeOH_A001_run3	13		4	12.4987	49.94	49.99	225	225	12	38	8.71227	95.99	23.99	0	80	0	0	0	159.9	96	24	0	80	0	0	0	159.98	0	65	35	65	35	0	0	35.25	785.05	149.93	238.57	179.92	179.91	27.65	150	250	180	180
3086	2023-01-23 21:24:41	2023-01-23 20:24:41	FALSE	230116_CO2toMeOH_A001_run3	13		4	12.5006	49.98	50	250.08	250	13	14	10.6119	96	24	0	80.01	0	0	0	160.02	96	24	0	80	0	0	0	159.98	0	65.01	35	65	35	0	0	35.29	785.17	150.16	239.93	180.04	180.03	28.49	150	250	180	180
3094	2023-01-23 23:02:41	2023-01-23 22:02:41	FALSE	230116_CO2toMeOH_A001_run3	13		4	12.5	50.01	50.01	250	250	13	38	12.2451	96	24	0	80	0	0	0	160.29	96	24	0	80	0	0	0	159.98	0	65.01	35	65	35	0	0	35.33	784.97	149.99	238.22	179.95	179.94	28.69	150	250	180	180
3101	2023-01-24 00:41:45	2023-01-23 23:41:45	FALSE	230116_CO2toMeOH_A001_run3	13		4	12.5006	50.03	50	249.99	250	14	14	13.8962	96	24	0	80.01	0	0	0	159.98	96	24	0	80	0	0	0	159.98	0	65	35	65	35	0	0	35.33	785.19	149.88	237.43	180.02	179.97	28.69	150	250	180	180
3109	2023-01-24 02:19:44	2023-01-24 01:19:44	FALSE	230116_CO2toMeOH_A001_run3	13		4	12.5012	49.96	50	250.01	250	14	38	15.5294	96	24	0	80.02	0	0	0	159.78	96	24	0	80	0	0	0	159.98	0	65	35	65	35	0	0	35.22	785.04	150.04	242.39	180.03	180	28.76	150	250	180	180
3117	2023-01-24 04:13:56	2023-01-24 03:13:56	FALSE	230116_CO2toMeOH_A001_run3	13		4	12.5013	49.96	50	275.07	275	15	14	17.4325	96.01	24	0	80.01	0	0	0	159.82	96	24	0	80	0	0	0	159.98	0	65	35	65	35	0	0	35.27	785.26	149.86	238.94	179.96	179.98	29.68	150	250	180	180
3125	2023-01-24 05:51:55	2023-01-24 04:51:55	FALSE	230116_CO2toMeOH_A001_run3	13		4	12.4994	49.93	50	275.03	275	15	38	19.0658	96	24	0	79.99	0	0	0	159.94	96	24	0	80	0	0	0	159.98	0	64.99	35	65	35	0	0	35.36	785.03	149.92	239.48	179.94	179.99	29.7	150	250	180	180
3133	2023-01-24 07:30:59	2023-01-24 06:30:59	FALSE	230116_CO2toMeOH_A001_run3	13		4	12.5	49.92	50	275	275	16	14	20.7168	96	24	0	80	0	0	0	160.17	96	24	0	80	0	0	0	159.98	0	65	35	65	35	0	0	35.29	785.16	149.79	237.57	180.01	180.01	29.89	150	250	180	180
3141	2023-01-24 09:08:58	2023-01-24 08:08:58	FALSE	230116_CO2toMeOH_A001_run3	13		4	12.5006	49.94	50.01	274.99	275	16	38	22.35	96.01	24	0	80	0	0	0	160.02	96	24	0	80	0	0	0	159.98	0	65	35	65	35	0	0	35.42	784.92	150.08	239.65	180.01	179.97	29.64	150	250	180	180
3149	2023-01-24 11:03:28	2023-01-24 10:03:28	FALSE	230116_CO2toMeOH_A001_run3	13		4	12.4969	49.98	50.01	300.07	300	17	14	24.2582	96	23.99	0	79.96	0	0	0	160.13	96	24	0	80	0	0	0	159.98	0	65	35	65	35	0	0	35.67	784.86	149.82	237.04	180.07	179.97	30.35	150	250	180	180
3157	2023-01-24 12:41:27	2023-01-24 11:41:27	FALSE	230116_CO2toMeOH_A001_run3	13		4	12.5025	49.94	49.98	300	300	17	38	25.8914	96.02	24	0	80.02	0	0	0	159.94	96	24	0	80	0	0	0	159.98	0	64.99	35	65	35	0	0	35.76	784.69	150.04	237.65	179.9	179.96	30.55	150	250	180	180
3165	2023-01-24 14:20:31	2023-01-24 13:20:31	FALSE	230116_CO2toMeOH_A001_run3	13		4	12.4981	49.96	50.01	300	300	18	14	27.5423	96	24	0	79.97	0	0	0	159.86	96	24	0	80	0	0	0	159.98	0	65	35	65	35	0	0	35.81	784.61	149.94	237.65	180	180.01	30.73	150	250	180	180
3173	2023-01-24 15:58:30	2023-01-24 14:58:30	FALSE	230116_CO2toMeOH_A001_run3	13		4	12.5	49.98	50	300.01	300	18	38	29.1756	96.01	24	0	79.99	0	0	0	159.86	96	24	0	80	0	0	0	159.98	0	65	35	65	35	0	0	35.74	784.86	150.13	243.5	179.99	180	30.54	150	250	180	180
3055	2023-01-23 14:47:54	2023-01-23 13:47:54	FALSE	230116_CO2toMeOH_A001_run3	14		4	12.5006	50.24	50.13	225	225	11	17	3.99867	96.01	24	0	80	0	0	0	120.4	96	24	0	80	0	0	0	159.98	0	65.01	35	65	35	0	0	35.15	785.23	150.02	239.44	179.92	179.95	27.56	150	250	180	180
3063	2023-01-23 16:25:53	2023-01-23 15:25:53	FALSE	230116_CO2toMeOH_A001_run3	14		4	12.5	50.15	50	224.98	225	11	41	5.63192	96	24	0	80	0	0	0	160.44	96	24	0	80	0	0	0	159.98	0	64.99	35	65	35	0	0	35.25	785.3	150.01	239.29	180.1	180.07	27.57	150	250	180	180
3071	2023-01-23 18:04:58	2023-01-23 17:04:58	FALSE	230116_CO2toMeOH_A001_run3	14		4	12.4994	50.15	50.01	225	225	12	17	7.2832	95.98	24	0	80.01	0	0	0	159.82	96	24	0	80	0	0	0	159.98	0	64.99	35	65	35	0	0	35.27	785.25	149.7	239.74	180	179.97	27.7	150	250	180	180
3079	2023-01-23 19:42:57	2023-01-23 18:42:57	FALSE	230116_CO2toMeOH_A001_run3	14		4	12.5006	50.17	49.99	224.99	225	12	41	8.91642	96.01	24	0	80	0	0	0	159.94	96	24	0	80	0	0	0	159.98	0	65	35	65	35	0	0	35.25	785.07	149.94	240.21	180.01	180.08	27.59	150	250	180	180
3087	2023-01-23 21:36:56	2023-01-23 20:36:56	FALSE	230116_CO2toMeOH_A001_run3	14		4	12.4975	50.15	49.99	250.05	250	13	17	10.8161	95.99	23.99	0	79.98	0	0	0	159.86	96	24	0	80	0	0	0	159.98	0	65	35	65	35	0	0	35.29	785.03	150.02	238.91	180.02	179.94	28.58	150	250	180	180
3095	2023-01-23 23:14:56	2023-01-23 22:14:56	FALSE	230116_CO2toMeOH_A001_run3	14		4	12.5	50.11	49.99	249.99	250	13	41	12.4493	96	24.01	0	79.99	0	0	0	160.02	96	24	0	80	0	0	0	159.98	0	64.99	35	65	35	0	0	35.33	785.12	150.05	238.8	179.91	179.95	28.77	150	250	180	180
3102	2023-01-24 00:54:00	2023-01-23 23:54:00	FALSE	230116_CO2toMeOH_A001_run3	14		4	12.5025	50.17	49.99	249.99	250	14	17	14.1004	96	23.99	0	80.05	0	0	0	159.82	96	24	0	80	0	0	0	159.98	0	65	35	65	35	0	0	35.31	785.04	149.97	241.81	179.98	179.99	28.89	150	250	180	180
3110	2023-01-24 02:31:59	2023-01-24 01:31:59	FALSE	230116_CO2toMeOH_A001_run3	14		4	12.4994	50.17	49.99	249.97	250	14	41	15.7336	96.02	23.99	0	79.98	0	0	0	160.09	96	24	0	80	0	0	0	159.98	0	65	35	65	35	0	0	35.21	785.29	150.25	241.69	179.95	180.02	28.97	150	250	180	180
3118	2023-01-24 04:26:11	2023-01-24 03:26:11	FALSE	230116_CO2toMeOH_A001_run3	14		4	12.5006	50.17	50	275.05	275	15	17	17.6367	96	24	0	80.01	0	0	0	159.63	96	24	0	80	0	0	0	159.98	0	65.01	35	65	35	0	0	35.28	785	149.92	240.88	179.96	180.07	29.59	150	250	180	180
3126	2023-01-24 06:04:10	2023-01-24 05:04:10	FALSE	230116_CO2toMeOH_A001_run3	14		4	12.5	50.18	50	275.03	275	15	41	19.2699	96.01	24	0	79.99	0	0	0	159.98	96	24	0	80	0	0	0	159.98	0	64.99	35	65	35	0	0	35.36	784.98	150.02	238.49	179.96	180.02	29.71	150	250	180	180
3134	2023-01-24 07:43:14	2023-01-24 06:43:14	FALSE	230116_CO2toMeOH_A001_run3	14		4	12.4969	50.13	50	274.99	275	16	17	20.9209	95.98	24	0	79.97	0	0	0	160.13	96	24	0	80	0	0	0	159.98	0	64.99	35	65	35	0	0	35.28	785.03	150.15	240.53	179.99	179.98	29.82	150	250	180	180
3142	2023-01-24 09:21:13	2023-01-24 08:21:13	FALSE	230116_CO2toMeOH_A001_run3	14		4	12.5006	50.13	49.98	274.99	275	16	41	22.5541	96.01	23.99	0	80.01	0	0	0	160.21	96	24	0	80	0	0	0	159.98	0	65	35	65	35	0	0	35.44	784.97	150.01	239.09	179.98	179.97	29.66	150	250	180	180
3150	2023-01-24 11:15:43	2023-01-24 10:15:43	FALSE	230116_CO2toMeOH_A001_run3	14		4	12.4988	50.12	49.99	300.07	300	17	17	24.4623	95.99	24.01	0	79.98	0	0	0	160.05	96	24	0	80	0	0	0	159.98	0	65	35	65	35	0	0	35.69	784.71	149.88	237.63	180.03	180	30.48	150	250	180	180
3158	2023-01-24 12:53:42	2023-01-24 11:53:42	FALSE	230116_CO2toMeOH_A001_run3	14		4	12.5019	50.15	50	300.01	300	17	41	26.0955	96.01	24	0	80.02	0	0	0	159.98	96	24	0	80	0	0	0	159.98	0	64.99	35	65	35	0	0	35.77	784.6	150.03	238.54	180.01	180	30.6	150	250	180	180
3166	2023-01-24 14:32:46	2023-01-24 13:32:46	FALSE	230116_CO2toMeOH_A001_run3	14		4	12.4981	50.13	50	300	300	18	17	27.7464	96	23.99	0	79.98	0	0	0	159.94	96	24	0	80	0	0	0	159.98	0	65	35	65	35	0	0	35.82	784.66	149.95	237.02	179.93	180.05	30.66	150	250	180	180
3174	2023-01-24 16:10:45	2023-01-24 15:10:45	FALSE	230116_CO2toMeOH_A001_run3	14		4	12.4994	50.13	49.98	300.01	300	18	41	29.3797	95.99	24	0	80	0	0	0	160.05	96	24	0	80	0	0	0	159.98	0	65	35	65	35	0	0	35.7	784.66	150.02	238.69	179.95	180.02	30.63	150	250	180	180
3056	2023-01-23 15:00:09	2023-01-23 14:00:09	FALSE	230116_CO2toMeOH_A001_run3	15		4	12.5006	50.08	50	225	225	11	20	4.20284	96	24	0	80.01	0	0	0	124.21	96	24	0	80	0	0	0	159.98	0	65.04	35	65	35	0	0	35.17	785.13	149.9	237.73	180.08	180	27.6	150	250	180	180
3064	2023-01-23 16:38:08	2023-01-23 15:38:08	FALSE	230116_CO2toMeOH_A001_run3	15		4	12.4988	50.09	50	225.01	225	11	44	5.83608	96.01	23.99	0	79.98	0	0	0	160.44	96	24	0	80	0	0	0	159.98	0	65	35	65	35	0	0	35.25	785.11	149.91	239.37	180.03	180.01	27.61	150	250	180	180
3072	2023-01-23 18:17:13	2023-01-23 17:17:13	FALSE	230116_CO2toMeOH_A001_run3	15		4	12.5006	50.06	50	224.99	225	12	20	7.48735	95.98	23.99	0	80.04	0	0	0	159.9	96	24	0	80	0	0	0	159.98	0	65	35	65	35	0	0	35.25	785.09	150	240.51	179.99	180	27.55	150	250	180	180
3080	2023-01-23 19:55:12	2023-01-23 18:55:12	FALSE	230116_CO2toMeOH_A001_run3	15		4	12.5006	50.09	50	224.98	225	12	44	9.12055	96.01	24	0	80	0	0	0	159.82	96	24	0	80	0	0	0	159.98	0	65	35	65	35	0	0	35.23	785.29	149.92	239.98	179.93	179.98	27.69	150	250	180	180
3088	2023-01-23 21:49:11	2023-01-23 20:49:11	FALSE	230116_CO2toMeOH_A001_run3	15		4	12.4987	50.09	49.99	250.04	250	13	20	11.0202	96	23.99	0	79.99	0	0	0	159.67	96	24	0	80	0	0	0	159.98	0	65	35	65	35	0	0	35.31	785	149.91	241.17	180.02	179.99	28.61	150	250	180	180
3096	2023-01-23 23:27:11	2023-01-23 22:27:11	FALSE	230116_CO2toMeOH_A001_run3	15		4	12.4994	50.08	49.99	250.02	250	13	44	12.6535	96	23.99	0	80	0	0	0	159.94	96	24	0	80	0	0	0	159.98	0	64.99	35	65	35	0	0	35.33	785	150.04	240.62	179.99	180.01	28.64	150	250	180	180
3103	2023-01-24 01:06:15	2023-01-24 00:06:15	FALSE	230116_CO2toMeOH_A001_run3	15		4	12.4988	50.1	50	249.98	250	14	20	14.3045	96	24	0	79.98	0	0	0	159.82	96	24	0	80	0	0	0	159.98	0	65	35	65	35	0	0	35.28	785.02	149.78	240.78	179.97	179.91	28.64	150	250	180	180
3111	2023-01-24 02:44:14	2023-01-24 01:44:14	FALSE	230116_CO2toMeOH_A001_run3	15		4	12.4975	50.14	50	249.99	250	14	44	15.9377	95.99	23.99	0	79.98	0	0	0	160.05	96	24	0	80	0	0	0	159.98	0	65	35	65	35	0	0	35.2	785.34	149.84	239.87	180.01	179.95	28.78	150	250	180	180
3119	2023-01-24 04:38:25	2023-01-24 03:38:25	FALSE	230116_CO2toMeOH_A001_run3	15		4	12.4994	50.1	50.01	275.02	275	15	20	17.8409	96	24	0	79.99	0	0	0	159.78	96	24	0	80	0	0	0	159.98	0	65	35	65	35	0	0	35.3	785.01	150.04	238.62	180.01	179.94	29.63	150	250	180	180
3127	2023-01-24 06:16:25	2023-01-24 05:16:25	FALSE	230116_CO2toMeOH_A001_run3	15		4	12.5031	50.13	50	274.99	275	15	44	19.4741	96.02	24	0	80.03	0	0	0	159.94	96	24	0	80	0	0	0	159.98	0	65	35	65	35	0	0	35.39	785.14	150.01	236.16	180	179.99	29.71	150	250	180	180
3135	2023-01-24 07:55:29	2023-01-24 06:55:29	FALSE	230116_CO2toMeOH_A001_run3	15		4	12.5	50.1	50	274.99	275	16	20	21.1251	96	24	0	80	0	0	0	159.94	96	24	0	80	0	0	0	159.98	0	65	35	65	35	0	0	35.28	785.06	150.09	239.84	180.06	180.01	29.81	150	250	180	180
3143	2023-01-24 09:33:28	2023-01-24 08:33:28	FALSE	230116_CO2toMeOH_A001_run3	15		4	12.5	50.13	50.01	275.02	275	16	44	22.7583	96	24.01	0	79.99	0	0	0	160.13	96	24	0	80	0	0	0	159.98	0	65	35	65	35	0	0	35.47	785.06	150.29	241.1	179.95	179.96	29.69	150	250	180	180
3151	2023-01-24 11:27:58	2023-01-24 10:27:58	FALSE	230116_CO2toMeOH_A001_run3	15		4	12.4994	50.09	49.99	300.03	300	17	20	24.6664	96	23.99	0	80	0	0	0	159.9	96	24	0	80	0	0	0	159.98	0	65	35	65	35	0	0	35.73	784.63	149.86	235.6	180	180	30.45	150	250	180	180
3159	2023-01-24 13:05:57	2023-01-24 12:05:57	FALSE	230116_CO2toMeOH_A001_run3	15		4	12.5012	50.1	49.99	300.01	300	17	44	26.2997	96	24	0	80.02	0	0	0	159.71	96	24	0	80	0	0	0	159.98	0	65	34.99	65	35	0	0	35.78	784.78	150.01	236.63	179.94	179.96	30.62	150	250	180	180
3167	2023-01-24 14:45:01	2023-01-24 13:45:01	FALSE	230116_CO2toMeOH_A001_run3	15		4	12.5	50.11	49.99	299.99	300	18	20	27.9506	95.99	24.01	0	80	0	0	0	160.02	96	24	0	80	0	0	0	159.98	0	65	35	65	35	0	0	35.83	784.58	150.04	239.39	179.99	180	30.59	150	250	180	180
3175	2023-01-24 16:23:00	2023-01-24 15:23:00	FALSE	230116_CO2toMeOH_A001_run3	15		4	12.4994	50.1	49.99	300	300	18	44	29.5838	96	23.99	0	80	0	0	0	159.98	96	24	0	80	0	0	0	159.98	0	65	35	65	35	0	0	35.67	784.86	150	238.11	179.99	179.93	30.65	150	250	180	180
3057	2023-01-23 15:12:24	2023-01-23 14:12:24	FALSE	230116_CO2toMeOH_A001_run3	16		4	12.4987	50.08	50	225	225	11	23	4.407	95.99	23.99	0	80	0	0	0	159.05	96	24	0	80	0	0	0	159.98	0	65	35	65	35	0	0	35.19	785.34	150.14	238.62	180	179.97	27.57	150	250	180	180
3065	2023-01-23 16:50:23	2023-01-23 15:50:23	FALSE	230116_CO2toMeOH_A001_run3	16		4	12.5006	50.12	50.02	225.02	225	11	47	6.04023	95.99	24	0	80.02	0	0	0	159.86	96	24	0	80	0	0	0	159.98	0	65	35	65	35	0	0	35.25	785.23	150.29	237.91	179.99	180	27.55	150	250	180	180
3073	2023-01-23 18:29:28	2023-01-23 17:29:28	FALSE	230116_CO2toMeOH_A001_run3	16		4	12.5006	50.12	50	225	225	12	23	7.69151	96	24.01	0	80	0	0	0	160.02	96	24	0	80	0	0	0	159.98	0	65	35	65	35	0	0	35.22	785.07	149.95	238.89	179.98	179.94	27.69	150	250	180	180
3081	2023-01-23 20:07:27	2023-01-23 19:07:27	FALSE	230116_CO2toMeOH_A001_run3	16		4	12.4994	50.11	50	225.01	225	12	47	9.3247	96	24	0	79.99	0	0	0	159.94	96	24	0	80	0	0	0	159.98	0	65	35	65	35	0	0	35.26	785.22	149.91	238.82	179.98	180.05	27.66	150	250	180	180
3089	2023-01-23 22:01:26	2023-01-23 21:01:26	FALSE	230116_CO2toMeOH_A001_run3	16		4	12.4981	50.07	49.99	250.03	250	13	23	11.2244	96	24.01	0	79.96	0	0	0	160.05	96	24	0	80	0	0	0	159.98	0	64.99	35	65	35	0	0	35.32	785.24	150.09	237.06	179.94	179.98	28.49	150	250	180	180
3097	2023-01-23 23:39:26	2023-01-23 22:39:26	FALSE	230116_CO2toMeOH_A001_run3	16		4	12.4994	50.06	50.01	249.98	250	13	47	12.8576	95.99	24	0	80	0	0	0	159.67	96	24	0	80	0	0	0	159.98	0	65	35	65	35	0	0	35.31	785.15	150.15	237.57	179.97	179.98	28.77	150	250	180	180
3104	2023-01-24 01:18:30	2023-01-24 00:18:30	FALSE	230116_CO2toMeOH_A001_run3	16		4	12.4956	50.07	50	250	250	14	23	14.5087	95.99	24	0	79.94	0	0	0	159.82	96	24	0	80	0	0	0	159.98	0	64.99	35	65	35	0	0	35.25	785.05	149.98	236.75	180.03	180.02	28.71	150	250	180	180
3112	2023-01-24 02:56:29	2023-01-24 01:56:29	FALSE	230116_CO2toMeOH_A001_run3	16		4	12.5	50.02	49.99	250.01	250	14	47	16.1419	96.01	24	0	79.99	0	0	0	159.78	96	24	0	80	0	0	0	159.98	0	65	35	65	35	0	0	35.19	785.33	150.14	241.8	180	179.99	28.91	150	250	180	180
3120	2023-01-24 04:50:40	2023-01-24 03:50:40	FALSE	230116_CO2toMeOH_A001_run3	16		4	12.495	50.07	50	275.01	275	15	23	18.045	95.99	23.99	0	79.94	0	0	0	160.21	96	24	0	80	0	0	0	159.98	0	65	35	65	35	0	0	35.32	784.99	150.13	238.75	180.02	179.96	29.66	150	250	180	180
3128	2023-01-24 06:28:40	2023-01-24 05:28:40	FALSE	230116_CO2toMeOH_A001_run3	16		4	12.4994	50.04	49.97	275	275	15	47	19.6783	96.02	23.99	0	79.98	0	0	0	159.9	96	24	0	80	0	0	0	159.98	0	65	34.99	65	35	0	0	35.38	784.93	150.06	238.56	179.96	180.02	29.69	150	250	180	180
3136	2023-01-24 08:07:44	2023-01-24 07:07:44	FALSE	230116_CO2toMeOH_A001_run3	16		4	12.4956	50.06	50	275	275	16	23	21.3292	95.99	23.99	0	79.95	0	0	0	160.02	96	24	0	80	0	0	0	159.98	0	65	35	65	35	0	0	35.31	785.1	150.11	239.61	180.01	180.02	29.85	150	250	180	180
3144	2023-01-24 09:45:43	2023-01-24 08:45:43	FALSE	230116_CO2toMeOH_A001_run3	16		4	12.5019	50.12	49.99	275	275	16	47	22.9624	96	24	0	80.03	0	0	0	160.02	96	24	0	80	0	0	0	159.98	0	65	35	65	35	0	0	35.47	784.88	150.07	239.38	179.97	180.04	29.72	150	250	180	180
3152	2023-01-24 11:40:12	2023-01-24 10:40:12	FALSE	230116_CO2toMeOH_A001_run3	16		4	12.4994	50.06	50.01	300.03	300	17	23	24.8706	96	24	0	79.99	0	0	0	159.86	96	24	0	80	0	0	0	159.98	0	65.01	35	65	35	0	0	35.73	784.82	149.95	236.06	180.05	180.03	30.57	150	250	180	180
3160	2023-01-24 13:18:12	2023-01-24 12:18:12	FALSE	230116_CO2toMeOH_A001_run3	16		4	12.5	50.1	50	300.01	300	17	47	26.5038	96	24	0	80	0	0	0	160.02	96	24	0	80	0	0	0	159.98	0	65	35	65	35	0	0	35.78	784.82	150	238.92	179.96	179.98	30.67	150	250	180	180
3168	2023-01-24 14:57:15	2023-01-24 13:57:15	FALSE	230116_CO2toMeOH_A001_run3	16		4	12.5006	50.08	49.99	299.99	300	18	23	28.1548	96	24	0	80.01	0	0	0	160.02	96	24	0	80	0	0	0	159.98	0	64.99	35.01	65	35	0	0	35.82	784.76	150.05	238.83	180.06	179.99	30.64	150	250	180	180
3176	2023-01-24 16:35:15	2023-01-24 15:35:15	FALSE	230116_CO2toMeOH_A001_run3	16		4	12.4981	50.08	50	300	300	18	47	29.788	96.01	24	0	79.96	0	0	0	159.9	96	24	0	80	0	0	0	159.98	0	65.01	35	65	35	0	0	35.64	784.95	150.07	238.94	179.98	180.02	30.58	150	250	180	180
[truncated: 235 more columns]
